1 ***TIC236* gain-of-function mutations unveil the link between plastid division and**  
2 **plastid protein import**

3

4 Jun Fang<sup>a,b,1</sup>, Bingqi Li<sup>a,b,1</sup>, Lih-Jen Chen<sup>c</sup>, Vivek Dogra<sup>a</sup>, Shengji Luo<sup>a,b</sup>, Pengcheng  
5 Wang<sup>a</sup>, Inhwan Hwang<sup>d</sup>, Hsou-min Li<sup>c</sup>, and Chanhong Kim<sup>a,2</sup>

6

7 <sup>a</sup>Shanghai Center for Plant Stress Biology and CAS Center for Excellence in  
8 Molecular Plant Sciences, Chinese Academy of Sciences, Shanghai 200032, China

9 <sup>b</sup>University of the Chinese Academy of Sciences, Beijing 100049, China

10 <sup>c</sup>Institute of Molecular Biology, Academia Sinica, Taipei 11529, Taiwan

11 <sup>d</sup>Department of Life Sciences, Pohang University of Science and Technology,  
12 Pohang, Korea

13

14

15 <sup>1</sup> These authors contributed equally to this work.

16 <sup>2</sup> Address correspondence to [chanhongkim@psc.ac.cn](mailto:chanhongkim@psc.ac.cn)

17

18

19

20 Author ORCIDs:

21 Jun Fang: 0000-0003-2049-3271

22 Bingqi Li: 0000-0003-0863-0544

23 Lih-Jen Chen: 0000-0002-4231-2200

24 Vivek Dogra: 0000-0003-1853-8274

25 Hsou-min Li: 0000-0002-0211-7339

26 Chanhong Kim: 0000-0003-4133-9070

27

28

29

30

31

32

33

34

35 **Summary**

36 The chloroplast translocons TOC75 and TIC236 are homologs of the bacterial  
37 translocation and assembly module (Tam) A and TamB involved in protein export.  
38 Here, we unveil a TIC236-allied component, the chloroplast outer membrane protein  
39 CRUMPLED LEAF (CRL), absence of which impairs plastid division and induces  
40 autoimmune responses in *Arabidopsis thaliana*. A forward genetic screen aimed at  
41 finding *crl* suppressors revealed multiple *TIC236* gain-of-function mutations  
42 (TIC236GFs). Despite the low sequence identity between TIC236 and bacterial TamB,  
43 each mutated TIC236GF residue is conserved in TamB. Consistently, a *tic236*-  
44 knockdown mutant exhibited multiple lesion phenotypes similar to *crl*, indicating a  
45 shared functionality of CRL and TIC236. Ensuing reverse genetic analyses revealed  
46 genetic interaction between CRL and SP1, a RING-type ubiquitin E3 ligase, as well  
47 as with the plastid protease FTSH11, which function in TOC and TIC protein  
48 turnover, respectively. Loss of either SP1 or FTSH11 rescued *crl* mutant phenotypes  
49 to varying degrees due to increased translocon levels. Consistent with impaired  
50 plastid division exhibited by both *crl* and *tic236*-knockdown mutants, CRL interacts  
51 with the transit peptides of proteins essential in plastid division, and TIC236GF  
52 mutant proteins reinforce their import via increased TIC236 stability. Overall, our  
53 data shed new light on the links between plastid division, plant stress response and  
54 plastid protein import. We have also isolated and characterized the first GF mutants  
55 exhibiting increased protein import efficiency, which may inspire chloroplast  
56 engineering for agricultural advancement.

57

58

59 Chloroplasts evolved from a gram-negative cyanobacterial endosymbiont, with most  
60 cyanobacterial genes having been transferred to the host plant genome. Therefore,  
61 thousands of nuclear-encoded chloroplast proteins are post-translationally imported  
62 into chloroplasts, orchestrated by outer and inner envelope membrane (OEM and IEM)  
63 translocons, respectively termed TOC and TIC. Although an array of translocon  
64 proteins has been identified<sup>1,2</sup>, it had remained unclear how TOC and TIC accurately  
65 coordinate protein import across the two envelope membranes separated by an  
66 intermembrane space. Chen et al. (2018) shed some light on this question by  
67 discovering the TIC236 component, a homolog of the bacterial TRANSLOCON  
68 ASSEMBLY MODULE B (TamB)<sup>3</sup>. TIC236 is an integral IEM protein associated

69 with TIC components. Its C-terminal domain, located in the intermembrane space,  
70 directly interacts with the N-terminal polypeptide transport-associated (POTRA)  
71 domains of TOC75-III (hereafter TOC75), the channel protein in the TOC complex.  
72 The fact that TOC75 contains three POTRA domains like TamA<sup>4-6</sup> and that TIC236  
73 contains a TamB-like domain (annotated as DOMAIN OF UNKNOWN FUNCTION  
74 490) at the C terminus<sup>3,7</sup> clearly reflects their bacterial origins<sup>5</sup>. Like *toc75* mutants,  
75 *tic236* null mutants display embryonic lethality, indicating that the function of  
76 TIC236 is indispensable in plants. Consistently, chloroplasts isolated from viable  
77 *tic236*-knockdown (*kd*) mutants exhibit significantly deficient protein import  
78 capability<sup>3</sup>. These findings strongly suggest that the ‘bacterial exit route evolved into  
79 an entry path in plants’<sup>8</sup>.

80 Plastid division occurs in developing cells to ensure an optimal number of  
81 plastids is in place before cell division, requiring the import of a suite of plastid-  
82 division machinery (PDM) proteins. The loss of any vital PDM elements results in  
83 gigantic plastids and a drastically reduced plastid number per cell<sup>9</sup>. Unexpectedly,  
84 several Arabidopsis mutants deficient in plastid division, including *crumpled leaf* (*crl*),  
85 develop foliar cell death<sup>10</sup>, resembling lesion-mimicking mutants (LMM) that exhibit  
86 a light-dependent hypersensitive response-like cell death<sup>11,12</sup>. Like LMM, *crl* and  
87 other plastid division mutants constantly upregulate immune-related genes<sup>10,13</sup>. The  
88 gigantic chloroplasts of *crl* mutants also induce an abnormal cell cycle, with increased  
89 endoreduplication activity leading to stunted growth<sup>14</sup>. Previous studies have  
90 indicated that autoimmune responses, abnormal cell cycle, and growth inhibition are  
91 likely mediated by a process called retrograde signaling, i.e., signaling from the  
92 gigantic chloroplasts back to the nucleus<sup>10,13,14</sup>.

93 CRL is a nuclear-encoded chloroplast OEM protein. Its short N-terminal  
94 region resides in the intermembrane space, followed by a transmembrane domain and  
95 then a chromophore lyase CpcT/CpeT domain characterized from a cyanobacterial  
96 CpcT bilin lyase<sup>15</sup>. Although the lyase domain retains phycocyanobilin-binding  
97 aptitude<sup>16</sup>, there is no apparent correlation between phycocyanobilin-binding ability  
98 and *crl*-induced lesions in Arabidopsis<sup>17</sup>, indicating that CRL has gained a divergent  
99 function.

100

101 **Dominant *TIC236* gain-of-function mutations abolish *crl*-induced lesions**

102 To explore the function of CRL, we performed an ethyl methanesulfonate (EMS)  
103 mutagenesis screen to find suppressors of *crl* (*spcrl*). The mutagenized Arabidopsis  
104 M<sub>2</sub> seeds were germinated on soil, and plants showing a wild-type (WT)-like  
105 phenotype were selected for further analyses. Among ~24,000 M<sub>2</sub> plants, we found  
106 two robust *spcrl* mutants, namely *spcrl1* and *spcrl2*, whose visible phenotype is  
107 nearly indistinguishable from that of WT plants, as well as one (*spcrl3*) that displayed  
108 weaker suppressing efficacy, especially in terms of restoring plastid division (Fig. 1a  
109 and Extended Data Fig. 1). Whole-genome sequencing of genomic DNA isolated  
110 from each of these *spcrl* mutants identified putative causal missense mutations in  
111 *TIC236*, specifically *TIC236*<sup>D1212N</sup> in *spcrl1*, *TIC236*<sup>G1250E</sup> in *spcrl2*, and  
112 *TIC236*<sup>G1489R</sup> in *spcrl3* (Fig. 1b). Despite the low protein sequence identity (~29%)  
113 between Arabidopsis *TIC236* and *Escherichia coli* TamB, all three mutated residues  
114 are conserved in TamB (Extended Data Fig. 2) and across various plant species (Fig.  
115 1c), highlighting their importance. The phenotypes of genetically isolated  
116 *tic236(D1212N)*, *tic236(G1250E)*, and *tic236(G1489R)* single mutants proved similar  
117 to WT plants (Fig. 1d). To distinguish these gain-of-function (GF) mutants from  
118 *tic236-kd* mutants, i.e., *tic236-2* (SAIL104-F07, *Columbia* ecotype) and *tic236-3*  
119 (RIKEN PST00216, *Nossen* ecotype)<sup>3</sup>, we re-named *tic236(D1212N)* as *tic236-4gf*,  
120 *tic236(G1250E)* as *tic236-5gf*, and *tic236(D1489R)* as *tic236-6gf*, respectively (Fig.  
121 1d). Next, we crossed the isolated single mutant plants with the *crl* mutant to generate  
122 all possible genotypes in F<sub>2</sub> siblings. PCR-based genotyping of the GF mutants  
123 confirmed a dominant effect of the *TIC236-4GF* and *TIC236-5GF* mutations and a  
124 less dominant effect of *TIC236-6GF* in rescuing the *crl* phenotypes (Fig. 1e and f).  
125 Since *crl* causes constitutive expression of stress-related genes<sup>10,13,14</sup>, next we  
126 conducted global gene expression profiling of *spcrl1* relative to the *crl* mutant. Our  
127 results confirmed that the *TIC236-4GF* mutation is epistatic to *crl* (Fig. 1g, Extended  
128 Data Fig. 3, and Supplementary Table 1).

129

### 130 **CRL is associated with OEM translocon components**

131 Our discovery of the *TIC236GF* mutations among the *crl* suppressors led us to  
132 consider CRL as a probable translocon-associated factor. Accordingly, we co-  
133 immunoprecipitated biologically active GFP-tagged CRL and its accompanying  
134 proteins using GFP-conjugated magnetic Dynabeads (Extended Data Fig. 4a and b).  
135 Eluted proteins were trypsin-digested and subjected to mass spectrometry (MS)

136 analysis, revealing a total of 187 proteins (detected at least twice in *CRL-GFP crl* but  
137 not in *GFP* plants) (Supplementary Table 2), including TOC75, TOC34, TOC132 and  
138 TIC110, but not TIC236 (Extended Data Fig. 4c). Another eight import-related  
139 proteins—including TOC33, TOC159, TOC120, TIC20, and TIC214—were  
140 identified as putative albeit less significant CRL-associated proteins (Supplementary  
141 Table 3), which were only detected once in *CRL-GFP crl* and not in *GFP* samples. To  
142 date, we have not detected endogenous CRL or TIC236 in WT plants via our MS-  
143 based label-free chloroplast proteome assay, indicating their lower abundances and/or  
144 instability. Nonetheless, we validated the CRL-TOC interaction by means of  
145 coimmunoprecipitation-Western blot analysis (Fig. 2a). We then chose TOC33 and  
146 TOC34 to verify a direct interaction with CRL *in vivo* using a bimolecular  
147 fluorescence complementation (BiFC) assay. Whereas no Venus fluorescence signal  
148 was detected when the N-terminal half of Venus fluorescence protein (nV) alone and  
149 C-terminal Venus (cV)-tagged TOC33 or TOC34 were co-expressed in *Nicotiana*  
150 *benthamiana* leaves, co-expression of either cV-TOC33 or cV-TOC34 with CRL-nV  
151 generated apparent Venus fluorescence signal in chloroplast envelopes (Fig. 2b).  
152 Coimmunoprecipitation and subsequent immunoblot analyses further confirmed these  
153 interactions (Fig. 2c).

154

### 155 **Reduced translocon turnover substantially rescues the *crl* phenotypes**

156 TOC components undergo proteolysis via the ubiquitin-proteasome system (UPS) in a  
157 process referred to as chloroplast-associated protein degradation (CHLORAD)<sup>18,19</sup>.  
158 Together, the OEM-spanning RING-type ubiquitin E3 ligase, i.e., suppressor of *ppiI*  
159 locus 1 (SP1), the TOC75-like protein SP2 that lacks POTRA domains, and the  
160 cytosolic AAA+ chaperone CDC48 direct CHLORAD<sup>20</sup> (Fig. 3a). Loss of SP1  
161 increases the amount of TOC components, whereas SP1 overexpression (oxSP1)  
162 reduces them. SP1-mediated TOC degradation confers on plants tolerance to  
163 oxidative stress by decreasing the levels of reactive oxygen species (ROS, byproducts  
164 of photosynthesis), which arises from decreased import of photosynthesis-associated  
165 proteins and thus demonstrating the physiological importance of SP1<sup>21</sup>. If CRL  
166 protein functions in protein import, *spiI*-driven TOC accumulation may attenuate the  
167 *crl*-induced phenotypes. Indeed, we found that loss of SP1 largely rescued the *crl*  
168 phenotypes (Fig. 3b, d, and Extended Data Fig. 5), just as it considerably rescued the  
169 *ppiI* mutant lacking TOC33<sup>20</sup>. This finding prompted us to also generate *crl fsh11*

170 double-knockout mutants. FTSH11 is a plastid metalloprotease implicated in TIC40  
171 turnover<sup>22</sup>. FTSH11 also physically interacts with CHAPERONIN 60 (CPN60), the  
172 activity of which is required for precursor protein maturation after excision of the  
173 transit peptide and plastid division<sup>22,23</sup>. Similar to SP1 that is required under oxidative  
174 stress conditions, FTSH11 plays a vital role in thermotolerance<sup>24,25</sup>. Loss of FTSH11  
175 significantly rescued the *crl* phenotypes, including those of plastid ultrastructure and  
176 division, as well as cell death (Fig. 3c, d, and Extended Data Fig. 6a and b). Moreover,  
177 loss of either SP1 or FTSH11 increased the levels of translocon components in both  
178 the *crl* mutant and WT (Fig. 3e and f). This reverse genetic approach using *sp1* and  
179 *ftsh11* mutants further reinforces the evidence for CRL being a translocon-allied  
180 component.

181

### 182 **A *TIC236* knockdown mutant also exhibits cell lesion and defective plastid** 183 **division phenotypes**

184 Next, we compared the phenotypes of *crl* and the *TIC236* knockdown mutant *tic236-2*.  
185 Remarkably, all *crl* phenotypes, such as growth retardation, localized cell death, and  
186 the plastid division defect, were recapitulated in *tic236-2* plants (Extended Data Fig.  
187 7a). The *tic236-2* mutant also exhibited aplastidic guard cells (only one chloroplast  
188 per guard cell pair), which resulted from impaired plastid division during stomatal  
189 biogenesis<sup>26</sup>. It is important to note that whereas *CRL* mutation causes persistently  
190 impaired plastid division, *tic236-2* mutant plants exhibit significantly uneven numbers  
191 and sizes of plastids per cell (Extended Data Fig. 7b and c), perhaps because different  
192 cellular protein levels of *TIC236* heterogeneously impede plastid division. For  
193 instance, if cells contain *TIC236* above a certain threshold level, leading to import of  
194 sufficient amounts of PDM preproteins, then plastid division would be  
195 indistinguishable from that displayed by WT cells. However, if levels of *TIC236* are  
196 below a certain threshold, then plastid division might be significantly impaired.  
197 Interestingly, *tic236-2* exhibited more cell death relative to that observed in the *crl*  
198 mutant, indicating that a combination of reduced general import capability and the  
199 plastid division defect may exacerbate cell death. The *crl*-induced defect in plastid  
200 division was epistatic to *tic236-2*, as only gigantic chloroplasts were observed in *crl*  
201 *tic236-2* double mutant plants (Extended Fig. 7a). This epistatic relationship reveals a  
202 fundamental role for CRL in plastid division and a synergistic impact of *TIC236*

203 knockdown (e.g., via general import) on *crl*-induced growth retardation and cell death  
204 (Extended Fig. 7a).

205

### 206 **GF mutations stabilize TIC236 and enhance protein import aptitude**

207 Our above described results suggest that *TIC236GF* mutations suppress *crl*-induced  
208 lesions via an enhanced protein import rate. Accordingly, we further examined this  
209 possibility by means of an *in vitro* import assay. We excluded the *crl* mutant itself  
210 because of its huge chloroplast size that impedes isolation of intact chloroplasts.  
211 [<sup>35</sup>S]methionine-labeled preproteins, including CASEIN LYTIC PROTEINASE C1  
212 (prCLPC1, also known as prHSP93), TRANSLOCON AT THE INNER ENVELOPE  
213 MEMBRANE OF CHLOROPLASTS 40 (prTIC40), OXYGEN EVOLVING  
214 COMPLEX SUBUNIT 23 kD (prOE23), and the PDM components FILAMENTING  
215 TEMPERATURE-SENSITIVE Z (FTSZ) homolog (prFTSZ) 2-1 and prFTSZ2-2  
216 were incubated with chloroplasts isolated from each genotype. The preproteins  
217 prOE23, prHSP93, and prTIC40 represent proteins that reside in thylakoid, stroma,  
218 and IEM, respectively. Consistent with a previous report<sup>3</sup>, *tic236-2* chloroplasts  
219 displayed significantly impaired import of all tested preproteins (Fig. 4a and b). In  
220 contrast, we observed enhanced preprotein import for *tic236-4gf* and *tic236-5gf*  
221 chloroplasts, and less so for *tic236-6gf* chloroplasts, in agreement with the respective  
222 plant phenotypes (Fig 1a, e and Extended Data Fig. 1). It is possible that the increase  
223 in *TIC236-6GF*-caused import was not adequately detected via *in vitro* import assay,  
224 which assesses import rate within an extremely short time period. However, the slight  
225 increase in protein import induced by *TIC236-6GF* throughout plant development  
226 may be sufficient to partially suppress the multiple defects caused by loss of CRL.

227 Assuming that the CRL-TIC236 module is required for importing PDM, we  
228 also examined the relative import rate of the vital PDM components FTSZ2-1 and  
229 FTSZ2-2. We observed enhanced import rates of both those proteins into *tic236-4gf*  
230 and *tic236-5gf* chloroplasts, and again less so in *tic236-6gf* chloroplasts (Fig. 4a, b),  
231 further evidencing a function for the CRL-TIC236 module in importing PDM for  
232 plastid division. Accordingly, we hypothesized that *TIC236GF* mutations promote  
233 preprotein import by stabilizing the TIC236 protein, which may compensate for the  
234 lack of CRL protein in chloroplasts. Indeed, we found that *TIC236-4GF* and *TIC236-*  
235 *5GF* mutations increased the steady-state levels of cognate mutant proteins compared  
236 to TIC236 in WT plants (Fig. 4c).

237 Impaired plastid division has not been reported for the few translocon mutants  
238 documented as viable, except for mutants of the chaperonin CPN60 complex that is  
239 required for protein import and thylakoid membrane protein insertion<sup>23,27,28</sup>. Since  
240 PDM import is a prerequisite for plastid division, we presumed that the CRL-TIC236  
241 module might import some PDM components, whereas the well established TIC236-  
242 harboring TOC/TIC complex acts in universal import, as evidenced by the embryonic  
243 lethality of the *tic236* knockout mutant. If this notion is correct, CRL might interact  
244 with the transit peptides of PDM components. BiFC assays confirmed interactions at  
245 the OEM of CRL with the transit peptides of FTSZ2-1 and FTSZ2-2 but not with  
246 those of RBCS and FTSZ1 (Extended Data Fig. 8a), suggesting its specificity towards  
247 certain PDM proteins. However, coexpression of CRL with the mature form (lacking  
248 the transit peptide) of either FTSZ2-1 and FTSZ2-2 resulted in abnormal Venus  
249 signals (foci and rod shapes, Extended Data Fig. 8b).

250

### 251 **TIC236 is functionally divergent from its ancestral TamB protein**

252 TIC236 homologs have been identified from all plant species in which they were  
253 sought. In rice, loss of SUBSTANDARD STARCH GRAIN 4 (SSG4), an ortholog of  
254 maize DEFECTIVE KERNEL 5 (DEK5) and Arabidopsis TIC236, causes plastid  
255 abnormality<sup>29</sup>. In maize, DEK5 inactivation impairs both plastid division and plastid  
256 envelope proteostasis, e.g., reduced or absent protein levels of translocon components  
257 and inorganic phosphate transporters<sup>30</sup>, so DEK5 appears to have retained its TamB  
258 functionality, mostly related to biogenesis of outer membrane proteins. In particular,  
259 levels of the OMP85-type  $\beta$ -barrel proteins TOC75 and OEP80 were diminished in  
260 *dek5* mutants<sup>30</sup>. If TIC236 functions in OEM protein biogenesis, we might expect to  
261 see reduced levels of translocons in *tic236-2* and increased levels in *tic236-gf* mutants,  
262 respectively. However, the *tic236-2* mutant does not exhibit reduced levels of  
263 TOC75<sup>3</sup>. Furthermore, all three of our *tic236-gf* mutant lines displayed comparable  
264 levels of TOC75 protein relative to WT plants (Fig. 4c). To further verify that result,  
265 we conducted label-free quantitative proteomics analyses using isolated chloroplasts  
266 of WT and *tic236-gf* mutants and found that levels of most of the TOC/TIC  
267 components in the *tic236-gf* mutants remained unchanged relative to WT (Fig. 4d and  
268 Supplementary Table 4).

269 CRL is believed to function in a ROS-triggered chloroplast-to-nucleus  
270 retrograde signaling pathway or as a putative PDM component in plastid



271 division<sup>10,14,15</sup>. However, our study using combined biochemical and forward/reverse  
272 genetic approaches has revealed its mutual functionality with the TIC236 protein.  
273 Since the *tic236* null mutant displays embryonic lethality<sup>3</sup>, whereas the *crl* mutant is  
274 viable despite multiple lesions (Fig. 1a), unlike CRL, the function of TIC236 in  
275 plastid translocons must be indispensable. The gigantic plastids in both the *crl* and  
276 *tic236-2* mutants (Extended Data Fig. 7), as well as the verified CRL-PDM  
277 interaction (Extended Data Fig. 8a), imply that the CRL-TIC236 module imports  
278 PDM proteins at the early phase of cell development. The observed cell death and  
279 chloroplast division phenotypes displayed by the *crl* and *tic236-2* mutants should be  
280 investigated in yet other translocon mutants to gain further insights into the passenger  
281 specificity of the CRL-TIC236 module, as well as into possible spatio-temporal  
282 heterogeneity of translocon complexes and its biological relevance. Importantly, our  
283 findings also open up a new research avenue linking chloroplast dysfunction  
284 (especially certain import pathways) to activation of autoimmune responses (Fig. 4e).

285 In summary, we have reported herein that: (i) CRL is a translocon-associated  
286 component, absence of which impairs plastid division; (ii) knockdown of *TIC236*  
287 induces multiple lesions and plastid division defects, as also observed in the *crl*  
288 mutant; (iii) three approaches for increasing translocon component abundance—  
289 knockout of either *SPI* or *FTSH11*, and gain-of-function *TIC236* mutations—all  
290 rescued *crl* plastid division defects; and (iv) *TIC236GF* mutations may provide a  
291 strategy for engineering the translocon to enhance protein import efficacy.

292

293

## 294 Main References

295

- 296 1 Schwenkert, S., Dittmer, S. & Soll, J. Structural components involved in  
297 plastid protein import. *Essays Biochem* **62**, 65-75,  
298 doi:10.1042/EBC20170093 (2018).
- 299 2 Richardson, L. G. L. & Schnell, D. J. Origins, function, and regulation of the  
300 TOC-TIC general protein import machinery of plastids. *J Exp Bot* **71**, 1226-  
301 1238, doi:10.1093/jxb/erz517 (2020).
- 302 3 Chen, Y. L. *et al.* TIC236 links the outer and inner membrane translocons  
303 of the chloroplast. *Nature* **564**, 125-129, doi:10.1038/s41586-018-0713-y  
304 (2018).
- 305 4 Patel, R., Hsu, S. C., Bedard, J., Inoue, K. & Jarvis, P. The Omp85-related  
306 chloroplast outer envelope protein OEP80 is essential for viability in

- 307 Arabidopsis. *Plant Physiol* **148**, 235-245, doi:10.1104/pp.108.122754  
308 (2008).
- 309 5 Selkrig, J. *et al.* Discovery of an archetypal protein transport system in  
310 bacterial outer membranes. *Nat Struct Mol Biol* **19**, 506-510, S501,  
311 doi:10.1038/nsmb.2261 (2012).
- 312 6 Selkrig, J. *et al.* Conserved features in TamA enable interaction with TamB  
313 to drive the activity of the translocation and assembly module. *Sci Rep* **5**,  
314 12905, doi:10.1038/srep12905 (2015).
- 315 7 Josts, I. *et al.* The structure of a conserved domain of TamB reveals a  
316 hydrophobic beta taco fold. *Structure* **25**, 1898-1906 e1895,  
317 doi:10.1016/j.str.2017.10.002 (2017).
- 318 8 Schnell, D. J. Exit route evolved into entry path in plants. *Nature* **564**, 45-  
319 46, doi:10.1038/d41586-018-07426-6 (2018).
- 320 9 Osteryoung, K. W. & Pyke, K. A. Division and dynamic morphology of  
321 plastids. *Annu Rev Plant Biol* **65**, 443-472, doi:10.1146/annurev-arplant-  
322 050213-035748 (2014).
- 323 10 Simkova, K. *et al.* The chloroplast division mutant *caa33* of *Arabidopsis*  
324 *thaliana* reveals the crucial impact of chloroplast homeostasis on stress  
325 acclimation and retrograde plastid-to-nucleus signaling. *Plant J* **69**, 701-  
326 712, doi:10.1111/j.1365-313X.2011.04825.x (2012).
- 327 11 Bruggeman, Q., Raynaud, C., Benhamed, M. & Delarue, M. To die or not to  
328 die? Lessons from lesion mimic mutants. *Front Plant Sci* **6**, 24,  
329 doi:10.3389/fpls.2015.00024 (2015).
- 330 12 Lorrain, S., Vailleau, F., Balague, C. & Roby, D. Lesion mimic mutants: keys  
331 for deciphering cell death and defense pathways in plants? *Trends Plant*  
332 *Sci* **8**, 263-271, doi:10.1016/S1360-1385(03)00108-0 (2003).
- 333 13 Li, B. *et al.* FATTY ACID DESATURASE5 is required to induce autoimmune  
334 responses in gigantic chloroplast mutants of *Arabidopsis*. *Plant Cell* **32**,  
335 3240-3255, doi:10.1105/tpc.20.00016 (2020).
- 336 14 Hudik, E. *et al.* Chloroplast dysfunction causes multiple defects in cell  
337 cycle progression in the *Arabidopsis* crumpled leaf mutant. *Plant Physiol*  
338 **166**, 152-167, doi:10.1104/pp.114.242628 (2014).
- 339 15 Asano, T. *et al.* A mutation of the CRUMPLED LEAF gene that encodes a  
340 protein localized in the outer envelope membrane of plastids affects the  
341 pattern of cell division, cell differentiation, and plastid division in  
342 *Arabidopsis*. *Plant J* **38**, 448-459, doi:10.1111/j.1365-313X.2004.02057.x  
343 (2004).
- 344 16 Grossman, A. R., Schaefer, M. R., Chiang, G. G. & Collier, J. L. The  
345 phycobilisome, a light-harvesting complex responsive to environmental  
346 conditions. *Microbiol Rev* **57**, 725-749 (1993).
- 347 17 Wang, F. *et al.* The *Arabidopsis* CRUMPLED LEAF protein, a homolog of  
348 the cyanobacterial bilin lyase, retains the bilin-binding pocket for a yet  
349 unknown function. *Plant J* **104**, 964-978, doi:10.1111/tpj.14974 (2020).
- 350 18 Ling, Q. *et al.* Ubiquitin-dependent chloroplast-associated protein  
351 degradation in plants. *Science* **363**, 836-+, doi:10.1126/science.aav4467  
352 (2019).
- 353 19 Shanmugabalaji, V. & Kessler, F. CHLORAD: Eradicating translocon  
354 components from the outer membrane of the chloroplast. *Mol Plant* **12**,  
355 467-469, doi:10.1016/j.molp.2019.03.002 (2019).

- 356 20 Ling, Q., Huang, W., Baldwin, A. & Jarvis, P. Chloroplast biogenesis is  
357 regulated by direct action of the ubiquitin-proteasome system. *Science*  
358 **338**, 655-659, doi:10.1126/science.1225053 (2012).
- 359 21 Ling, Q. & Jarvis, P. Regulation of chloroplast protein import by the  
360 ubiquitin E3 ligase SP1 is important for stress tolerance in plants. *Curr*  
361 *Biol* **25**, 2527-2534, doi:10.1016/j.cub.2015.08.015 (2015).
- 362 22 Adam, Z. *et al.* The chloroplast envelope protease FTSH11 - Interaction  
363 with CPN60 and identification of potential substrates. *Front Plant Sci* **10**,  
364 428, doi:10.3389/fpls.2019.00428 (2019).
- 365 23 Suzuki, K. *et al.* Plastid chaperonin proteins Cpn60 alpha and Cpn60 beta  
366 are required for plastid division in *Arabidopsis thaliana*. *BMC Plant Biol* **9**,  
367 38, doi:10.1186/1471-2229-9-38 (2009).
- 368 24 Chen, J., Xin, Z. & Burke, J. The conserved role of FtsH11 protease in  
369 protection of photosynthetic system from high temperature stress in  
370 higher plants. *Photosynthesis Res* **91**, 308-308,  
371 doi: 10.3389/fpls.2019.00428 (2007).
- 372 25 Chen, J., Burke, J. J. & Xin, Z. Chlorophyll fluorescence analysis revealed  
373 essential roles of FtsH11 protease in regulation of the adaptive responses  
374 of photosynthetic systems to high temperature. *BMC Plant Biol* **18**, 11,  
375 doi:10.1186/s12870-018-1228-2 (2018).
- 376 26 Chen, Y. *et al.* Plant cells without detectable plastids are generated in the  
377 crumpled leaf mutant of *Arabidopsis thaliana*. *Plant Cell Physiol* **50**, 956-  
378 969, doi:10.1093/pcp/pcp047 (2009).
- 379 27 Kessler, F. & Blobel, G. Interaction of the protein import and folding  
380 machineries of the chloroplast. *Proc Natl Acad Sci U S A* **93**, 7684-7689,  
381 doi:10.1073/pnas.93.15.7684 (1996).
- 382 28 Klasek, L., Inoue, K. & Theg, S. M. Chloroplast chaperonin-mediated  
383 targeting of a thylakoid membrane protein. *Plant Cell* **32**, 3884-3901,  
384 doi:10.1105/tpc.20.00309 (2020).
- 385 29 Matsushima, R. *et al.* Amyloplast-localized SUBSTANDARD STARCH  
386 GRAIN4 protein influences the size of starch grains in rice endosperm.  
387 *Plant Physiol* **164**, 623-636, doi:10.1104/pp.113.229591 (2014).
- 388 30 Zhang, J. *et al.* Maize defective kernel5 is a bacterial TamB homologue  
389 required for chloroplast envelope biogenesis. *J Cell Biol* **218**, 2638-2658,  
390 doi:10.1083/jcb.201807166 (2019).

391

392

## 393 **Materials and Methods**

### 394 **Plant material and growth conditions**

395 All *Arabidopsis* seeds used in this study are from the *Columbia-0* (*Col-0*) background.

396 All seed stocks, including *ftsh11-1* (SALK\_033047), *ftsh11-2* (SALK\_012285), *sp1-3*

397 (SALK\_002099), and *tic236-kd* (*tic236-2*, SAIL\_104-F07), were obtained from the

398 Nottingham *Arabidopsis* Stock Centre (NASC). The *crl* null mutant (GABI\_714\_E08)

399 and the transgenic *p35S::CRL-GFP crl* lines have been described previously<sup>13,17</sup>.

400 Their genotypes were confirmed by PCR-based analyses using the corresponding

401 primers (Supplementary Table 5). Seeds were sterilized in a 5% hypochlorite solution  
402 for 3 min, washed five times with sterilized water, and then sown on half-strength  
403 Murashige and Skoog (MS) medium (Duchefa Biochemie) with 0.5% (w/v) sucrose  
404 and 0.7% (w/v) agar. After stratification at 4 °C for 2 days (d) in the dark, the seeds  
405 germinated and grew under either continuous light (CL, 100  $\mu\text{mol m}^{-2} \text{s}^{-1}$  at  $22 \pm 2$  °C)  
406 or long-day (LD,  $22 \pm 2$  °C, 100  $\mu\text{mol m}^{-2} \text{s}^{-1}$  with a 16 h-light/8 h-dark photoperiod)  
407 conditions. *Nicotiana benthamiana* plants were grown under controlled LD conditions.  
408 Four-week-old *N. benthamiana* plants were used for all transient expression assays.

409

#### 410 **EMS mutagenesis and whole-genome sequencing analysis**

411 Under normal growth conditions, we screened the  $M_2$  progeny of  $\sim 12,000 M_1$  *crl*  
412 seeds that had been initially treated with 0.4% (w/v) ethylmethanesulfonate (EMS,  
413 Sigma-Aldrich) for 8 h as described previously<sup>31</sup>. The *spcrl1*, *spcrl2*, and *spcrl3*  
414 mutants were chosen to generate mapping populations. To do that, each *spcrl*  
415 homozygote mutant plant was backcrossed to the parental *crl* mutant. From the  $F_2$   
416 population, at least 50 plants exhibiting WT-like phenotypes were selected for  
417 genomic DNA extraction. Genomic DNA isolated from *crl* mutant plants was used as  
418 a control. Genomic DNA (1  $\mu\text{g}$ ) isolated using a DNeasy plant mini kit (Qiagen) was  
419 used for library construction. Sequencing was performed using a HiSeq2500 (Illumina)  
420 sequencer to generate 125 base pair (bp) paired-end reads as described in Li et al.  
421 (2020). The sequencing data were processed in SolexaQA<sup>32</sup> and Cutadapt (v.1.3)  
422 software to remove low-quality regions and adapter sequences, respectively. Clean  
423 reads were mapped to the TAIR10 genome in BWA-MEM<sup>33</sup> with default parameters.  
424 SNPs were called using the “mpileup” function of SAMtools<sup>34</sup>. Poor quality SNPs  
425 with a mapping quality <60 or with a depth <3 or >200 were filtered out using  
426 vcfTools<sup>35</sup>. Candidate causal mutations were identified using the SHOREmap  
427 method<sup>36</sup>. The allele frequency and the regions containing a possible causal mutation  
428 were analysed using SHOREmap v3.0<sup>37</sup>. Mutations within the open reading frame  
429 (ORF) of target genes were considered as potential causative mutations. The  
430 mutations were further confirmed by sequencing PCR products using the respective  
431 primers listed in Supplementary Table 5.

432

#### 433 **Coimmunoprecipitation and MS analyses**

434 The cDNA (lacking stop codons) of *CRL*, *TOC33*, and *TOC34* were PCR-amplified  
435 from WT cDNA and subsequently cloned into pDONR221-Zeo entry vectors by  
436 means of a Gateway BP clonase reaction (Invitrogen). To generate C-terminal tag-  
437 fused constructs, the purified cDNAs were cloned into destination vectors, including  
438 pGWB605 for sGFP or pGWB617 for 4xMyc, by Gateway LR clonase reactions  
439 (Invitrogen). Each vector was transformed into *Agrobacterium tumefaciens* strain  
440 GV3101. For transient expression (or co-expression), the suspensions of agrobacteria  
441 carrying different constructs were infiltrated into healthy leaves of 28-d-old *N.*  
442 *benthamiana* plants and protein-protein interactions were analyzed after 48 h. Total  
443 protein was extracted using a protein extraction (PE) buffer [Tris-HCl 50 mM (pH  
444 7.5), NaCl 150 mM, Glycerol 10% (v/v), DTT 10 mM, cOmplete protease inhibitor  
445 cocktail 1 tablet/50 ml (Roche), 1.1% (v/v) NP-40, EDTA 1 mM, Na<sub>2</sub>MoO<sub>4</sub> 1 mM,  
446 Sodium fluoride (NaF) 1 mM, and Sodium orthovanadate (Na<sub>3</sub>VO<sub>4</sub>) 1.5 mM]. After  
447 diluting total protein samples to 1-2 µg/µl, 20 mg of total protein was incubated with  
448 15 µl GFP-Trap<sup>MA</sup> beads (Chromotek) at 4 °C for 2 h, and then washed four times  
449 with PE buffer. Finally, the remaining proteins on the washed beads were eluted with  
450 2x SDS sample buffer at 95 °C for 10 min. The eluted proteins were subjected to 10%  
451 SDS-PAGE gels for immunoblot analyses using anti-GFP (Roche) and anti-Myc  
452 (Roche) antibodies.

453 For coimmunoprecipitation (Co-IP) and subsequent immunoblot analysis or  
454 Co-IP coupled to MS analysis, 14-d-old Arabidopsis rosette leaves were used.  
455 Rosettes were ground to a fine powder in liquid nitrogen and resuspended in IP buffer  
456 [HEPES 20 mM (pH 7.5), EDTA 2 mM, EGTA 2 mM, NaCl 100 mM, Glycerol 10%  
457 (v/v), Triton-X-100 0.2% (v/v), Na<sub>3</sub>VO<sub>4</sub> 1 mM, NaF 20 mM, and cOmplete protease  
458 inhibitor cocktail 1 tablet/50 ml (Roche)] at 4 °C for 1 h. After quantification using a  
459 Pierce<sup>TM</sup> BCA protein assay kit (Thermo Scientific), 10 mg of total protein was  
460 incubated with 50 µl Dynabeads Protein G (Thermo Scientific) that had been pre-  
461 conjugated with a monoclonal mouse anti-GFP antibody (Roche) at room temperature  
462 for 2 h. After washing five times, 10% of the beads were eluted with SDS sample  
463 buffer (2X) at 70 °C for 20 min, and then loaded on 10% SDS-PAGE gels for  
464 subsequent immunoblotting analysis.

465 In-gel digestion and ensuing MS analysis were performed according to a  
466 previous report<sup>38</sup>. The obtained mass spectra were compared against the TAIR10 non-  
467 redundant database using Mascot Server (v2.5.1). The parameter settings were set for

468 Peptide mass tolerance at 20 ppm, fragment mass tolerance at 0.02 Da, and a  
469 maximum of two missed cleavages was allowed. The significance threshold for  
470 search results was set at  $P < 0.05$ , with an ion score cutoff of 15. Proteins detected at  
471 least twice in the CRL-GFP samples, but not in the GFP samples, were considered  
472 potential interacting proteins of CRL (Supplementary Table 2).

473

#### 474 **BiFC assays**

475 In addition to the full-length cDNA of *CRL*, *TOC33*, and *TOC34*, cDNA encoding the  
476 transit peptide (tp) or mature (m) regions (without the stop codon) of *RBCS*, *FTSZ1*,  
477 *FTSZ2-1*, and *FTSZ2-2* were cloned into pDONR221-Zeo entry vectors for BiFC  
478 analyses. Through Gateway LR reactions (Thermo Scientific), these cDNAs were  
479 cloned into the CaMV 35S promoter (35S)-driven destination vector pDEST to  
480 generate tag-fused constructs. The full-length *CRL* cDNA (lacking the stop codon)  
481 was C-terminally fused with the N-terminal half of Venus (nV). The full-length  
482 *TOC33* and *TOC34* cDNAs were N-terminally fused with the C-terminal half of  
483 Venus (cV). cDNA corresponding to the transit peptides and mature regions of *RBCS*,  
484 *FTSZ1*, *FTSZ2-1*, and *FTSZ2-2* were C-terminally fused with cV. As described  
485 previously<sup>39</sup>, the N-terminal 79 residues of *RBCS* were constructed as the transit  
486 peptide region. Transit peptide regions of *FTSZ1* (1-90), *FTSZ2-1* (1-48), and  
487 *FTSZ2-2* (1-50) were predicted by the ChloroP1.1 server<sup>40,41</sup>. Then, tp-deleted and  
488 start codon-appended *RBCS*, *FTSZ1*, *FTSZ2-1*, and *FTSZ2-2* constructs were  
489 generated. Destination plasmids CRL-nV, cV-TOC33, cV-TOC34, tpRBCS-cV,  
490 tpFTSZ1-cV, tpFTSZ2-1-cV, tpFTSZ2-2-cV, mRBCS-cV, mFTSZ1-cV, mFTSZ2-1-  
491 cV, and mFTSZ2-2-cV were transformed into *Agrobacterium* strain GV3101. The  
492 *Agrobacterium* cultures were diluted to an OD<sub>600</sub> of 1.0, then resuspended and washed  
493 using infiltration solution [MES 10 mM (pH 5.6), MgCl<sub>2</sub> 10 mM, and Acetosyringone  
494 150 μM]. Mixtures of the selected strains were infiltrated into 28-d-old *N.*  
495 *benthamiana* leaves. After transient expression for 48 h, Venus fluorescence was  
496 analysed using confocal laser scanning microscopy (TCS SP8, Leica).

497

#### 498 **Protein extraction and immunoblot analysis**

499 Plant leaf tissues were ground to fine powder in liquid nitrogen and resuspended in IP  
500 buffer at 4 °C for 1 h. Protein concentration was determined using a Pierce<sup>TM</sup> BCA  
501 protein assay kit (Thermo Scientific). Equal concentrations of protein samples were

502 mixed with 4x SDS loading buffer, denatured at 95 °C for 5 min, and loaded into 10%  
503 SDS-PAGE gels. GFP-tagged proteins were detected with a mouse anti-GFP antibody  
504 (1:5000; Roche). Immunoblot results were quantified using Image J software (v1.8.0).

505

#### 506 ***In vitro* protein import assay**

507 [<sup>35</sup>S]Met-labeled preproteins were *in vitro*-transcribed/translated using the TNT-  
508 coupled wheat germ or reticulocyte lysate system and SP6 or T7 RNA polymerase  
509 (Promega). Growth of Arabidopsis seedlings (for 14 days on MS agar media with 2%  
510 sucrose), Arabidopsis chloroplast isolation, and import of [<sup>35</sup>S]-labeled preproteins  
511 into isolated chloroplasts were performed as described previously<sup>42</sup>. Accession  
512 numbers for preproteins are: Pea prTIC40 (AY157668), Pea prHSP93 (L09547),  
513 Arabidopsis prOE23 (At1g06680), Arabidopsis prFTSZ2-1 (At2g36250), and  
514 Arabidopsis prFTSZ2-2 (At3g52750).

515

#### 516 **Chloroplast size analysis**

517 Leaf petioles of 14-day-old seedlings grown on MS medium were excised and fixed  
518 in 3.5% glutaldehyde and then prepared for imaging with differential interference  
519 contrast microscopes as described previously<sup>43</sup>.

520

#### 521 **Cell death determination**

522 Cell death was assessed via Trypan blue (TB) staining as described previously<sup>13</sup>. The  
523 TB-stained plants were preserved in 10% (v/v) glycerol. Imaging was conducted  
524 using a TCS SP8 microscope (Leica Microsystems) and further processed using Leica  
525 LAS software (v4.2.0, Leica Microsystems).

526

#### 527 **Microscopic analyses**

528 Venus and chlorophyll autofluorescence signals were monitored under a confocal  
529 microscope at 520-600 nm of the emission spectrum with an excitation wavelength of  
530 514 nm (Leica TCS SP8). Representative images were processed using Leica LAS AF  
531 Lite software (v2.6.3, Leica Microsystems). Cotyledons of 5-d- and 10-d-old  
532 seedlings (before and after cell death, respectively) were mostly used for imaging  
533 GFP and chlorophyll autofluorescence unless otherwise indicated.

534 For transmission electron microscopy, cotyledons of 5-d-old seedlings were  
535 detached, pre-fixed, and then rinsed three times using 0.1 M PBS buffer as described

536 previously<sup>13</sup>. Then the samples were post-fixed overnight in 1% (v/v) osmic acid at  
537 4 °C, washed three times with 0.1 M PBS buffer, dehydrated using a gradient ethanol-  
538 acetone series, before being embedded in Spurr's resin. Ultrathin resin sections (70  
539 nm) were cut using a diamond knife on a Leica UC7 ultramicrotome, mounted on  
540 copper grids, and stained with 2% (w/v) uranyl acetate and 0.5% (w/v) lead citrate.  
541 The stained sections were monitored and photographed using a H7700 transmission  
542 electron microscope (Hitachi).

543

#### 544 **RNA-seq library construction and data analysis**

545 RNA-seq analysis was carried out as described previously<sup>44</sup>. Total RNA was  
546 extracted from three independent biological replicates of 5-d-old Arabidopsis  
547 seedlings of the *crl*, *sprcll*, and WT using the RNeasy Plant Mini Kit (Qiagen). The  
548 isolated RNA was subjected to on-column DNase digestion according to the  
549 manufacturer's instructions. A Nano Photometer spectrophotometer (IMPLEN) was  
550 used to verify RNA purity. A Qubit RNA Assay Kit and a Qubit 2.0 Fluorometer  
551 (Life Technologies) were employed to determine RNA concentration. An RNA Nano  
552 6000 Assay Kit and Bioanalyser 2100 system (Agilent Technologies) were used to  
553 assess RNA integrity for RNA-seq analyses. RNA-seq libraries were built using the  
554 NEBNext Ultra Directional RNA Library Prep Kit for Illumina (New England Biolab)  
555 based on the manufacturer's instructions. The RNA-seq libraries were sequenced on  
556 an Illumina HiSeq 2500 platform to generate 100 bp paired-end reads. The raw  
557 sequencing data were processed in SolexaQA (v2.2) to extract pair reads and to  
558 remove low-quality reads. The clean reads were mapped to the Arabidopsis genome  
559 (TAIR10) using TopHat<sup>45</sup>. After mapping, the Python-based software HTseq-count  
560 was used to extract raw counts of annotated genes. Differentially expressed genes  
561 (DEGs) were identified using the R package edgeR, which uses counts per gene in  
562 different samples and performs data normalization using the trimmed mean of M-  
563 values (TMM) method<sup>46</sup>. The gene expression data were normalized to transcripts per  
564 million (TPM) according to the total number of mapped clean reads in each library.  
565 Genes with at least a two-fold change in expression and a false discovery rate of less  
566 than 0.05 were deemed to be differentially expressed.

567

#### 568 **RNA extraction and quantitative RT-PCR**



569 Total RNA was prepared using the FastPure Plant Total RNA Isolation Kit (Vazyme).  
570 RNA (1 µg) was treated with RQ1 RNase-Free DNase (Promega) and reverse-  
571 transcribed using HiScript II Q RT SuperMix for qPCR (+gDNA wiper) (Vazyme)  
572 according to the manufacturer's instructions. Quantitative RT-PCR was performed  
573 using ChamQ Universal SYBR qPCR Master Mix (Vazyme) and a QuantStudio™ 6  
574 Flex Real-Time PCR System (Applied Biosystems). Transcript abundances were  
575 calculated using the delta-Ct method<sup>47</sup> and normalized to the transcript levels of  
576 *ACTIN2* (*AT3G18780*). The primers used in this study are listed in Supplemental  
577 Table 5.

578

### 579 **Chloroplast isolation and MS analysis**

580 Chloroplasts were isolated from 21-d-old plants as described previously<sup>48,49</sup>. Rosette  
581 leaves were homogenized in chloroplast isolation buffer [50 mM HEPES-KOH (pH  
582 8.0), 5 mM MgCl<sub>2</sub>, 5 mM EDTA (pH 8.0), 5 mM EGTA (pH 8.0), 10 mM NaHCO<sub>3</sub>,  
583 and 0.33 M D-sorbitol supplemented with one tablet (per 50 mL) of cComplete  
584 protease inhibitor cocktail (Roche)] using a Waring blender. After filtering through  
585 four-layer Miracloth, the homogenate was centrifuged at 400 × g for 8 min at 4 °C.  
586 The pellets were suspended using chloroplast isolation buffer and added onto a two-  
587 step Percoll gradient (40:80%). After centrifugation, the enriched chloroplasts  
588 between the two Percoll steps were carefully collected and washed twice using HS  
589 buffer [50 mM Hepes-KOH (pH 8.0) and 0.33 M D-sorbitol]. The chloroplasts were  
590 resuspended in guanidine hydrochloride buffer [6 M guanidine hydrochloride and 100  
591 mM Tris (pH 8.5)]. The resuspension was sonicated in an ice bath for 1 min with a  
592 pulse of 3 sec on and 5 sec off, followed by heating at 95 °C for 5 min, and  
593 centrifugation at 15000 rpm for 30 min at 4 °C. The supernatant contained the total  
594 chloroplast proteins. Protein concentration was determined using a Pierce™ BCA  
595 protein assay kit (Thermo Fisher Scientific).

596 For MS analysis, equal amounts of total protein from three independent  
597 biological samples were denatured with 10 mM DTT at 56 °C for 30 min. The  
598 denatured samples were subjected to alkylation in 50 mM iodoacetamide (IAA) in the  
599 dark for 40 min. The samples were then desalted in 100 mM NH<sub>4</sub>HCO<sub>3</sub> buffer  
600 through a Nanosep membrane (Pall Corporation, MWCO 10K). Desalted proteins  
601 were digested using trypsin (40 ng/µl trypsin and 100 mM NH<sub>4</sub>HCO<sub>3</sub>, enzyme-to-  
602 protein ratio 1:50) at 37 °C for 20 h. The cleaved peptides were then dried in a chilled

603 CentriVap concentrator (Labconco). The peptides were resuspended in 0.1% (v/v)  
604 formic acid (FA), and subjected to nanoAcquity Ultra Performance LC (Waters)  
605 through a 20 mm trap column (C18 5  $\mu\text{m}$  resin, 180  $\mu\text{m}$  I.D., Waters) with a flow rate  
606 of 3  $\mu\text{l}/\text{min}$  for 10 min, and then eluted to the analytical column (C18 1.7  $\mu\text{m}$  resin, 75  
607  $\mu\text{m}$  I.D., Waters) with a flow rate of 250  $\text{nl}/\text{min}$  under the following conditions: 140  
608 min gradient from 8-25% of solvent B (Acetonitrile, ACN); 15 min gradient from 25-  
609 40% of solvent B; 5 min gradient from 40-90% of solvent B; 5 min washing at 90%  
610 of solvent B, and finally equilibration with 97% of solvent A for 15 min (solvent A:  
611 0.1% FA; solvent B: 99.9% ACN/0.1% FA). After analyzing the separated peptides in  
612 a Q Exactive Mass Spectrometer (Thermo Electron Finnigan), a full MS survey scan  
613 was performed at a resolution of 70,000 at 400  $m/z$  over the  $m/z$  range of 300-1800,  
614 with an automatic gain controls (AGC) target of 3E6 and a maximum ion injection  
615 time (IT) of 30 msec. The top 20 multiply-charged parent ions were selected under  
616 data-dependent MS/MS mode and fragmented by higher-energy collision dissociation  
617 (HCD) with a normalized collision energy of 27% and an  $m/z$  scan range of 200-2000.  
618 MS/MS detection was carried out at a resolution of 17,500 with the AGC target value  
619 of 5E5 and the maximum IT of 120 msec. Dynamic exclusion was enabled for 30 sec.  
620

### 621 **Label-free quantitative proteomics analysis**

622 MaxQuant software (v1.5.8.3) with an intensity-based absolute quantification (iBAQ)  
623 algorithm was used to process and analyse raw MS data as described previously<sup>48,50,51</sup>.  
624 Parent ion and MS2 spectra were compared against the Arabidopsis Information  
625 Resource database (<http://www.arabidopsis.org/>). The precursor ion tolerance was set  
626 at 7 ppm, and a fragment mass deviation of 20 ppm was allowed. The detected  
627 peptides with a minimum of six amino acids and a maximum of two missed cleavages  
628 were assigned. For both peptide and protein identification, the false discovery rate  
629 (FDR) was set to 0.01. The iBAQ intensity value was used as an accurate proxy to  
630 calculate protein amounts. Proteins detected with iBAQ intensity values in at least  
631 two out of three independent biological samples were considered meaningful.

632

### 633 **Statistical analyses**

634 Numbers of biological replicates are presented in the figure legends. Statistical  
635 analyses were performed by two-tailed Student's *t*-test or one-way analysis of

636 variance (ANOVA) with a post-hoc Tukey's Honest Significant Difference test. *P*  
637 values of <0.05 were considered statistically significant.

638

### 639 **Data availability**

640 Data supporting the findings of this study are available within the paper and its  
641 Supplementary Information files. Source Data (gels and graphs) for Figs. 2-4 and  
642 Extended Data Figs. 3 and 4 are provided with the paper.

643

644

### 645 **Method References**

646

- 647 31 Kim, Y., Schumaker, K. S. & Zhu, J. K. EMS mutagenesis of Arabidopsis.  
648 *Methods Mol Biol* **323**, 101-103, doi:10.1385/1-59745-003-0:101 (2006).
- 649 32 Cox, M. P., Peterson, D. A. & Biggs, P. J. SolexaQA: At-a-glance quality  
650 assessment of Illumina second-generation sequencing data. *BMC*  
651 *Bioinformatics* **11**, 485, doi:10.1186/1471-2105-11-485 (2010).
- 652 33 Li, H. & Durbin, R. Fast and accurate short read alignment with Burrows-  
653 Wheeler transform. *Bioinformatics* **25**, 1754-1760,  
654 doi:10.1093/bioinformatics/btp324 (2009).
- 655 34 Li, H. *et al.* The Sequence Alignment/Map format and SAMtools.  
656 *Bioinformatics* **25**, 2078-2079, doi:10.1093/bioinformatics/btp352  
657 (2009).
- 658 35 Danecek, P. *et al.* The variant call format and VCFtools. *Bioinformatics* **27**,  
659 2156-2158, doi:10.1093/bioinformatics/btr330 (2011).
- 660 36 Schneeberger, K. *et al.* SHOREmap: simultaneous mapping and mutation  
661 identification by deep sequencing. *Nat Methods* **6**, 550-551,  
662 doi:10.1038/nmeth0809-550 (2009).
- 663 37 Sun, H. & Schneeberger, K. SHOREmap v3.0: fast and accurate  
664 identification of causal mutations from forward genetic screens. *Methods*  
665 *in molecular biology (Clifton, N.J.)* **1284**, 381-395, doi:10.1007/978-1-  
666 4939-2444-8\_19 (2015).
- 667 38 Wang, L. *et al.* Singlet oxygen- and EXECUTER1-mediated signaling is  
668 initiated in grana margins and depends on the protease FtsH2. *Proc Natl*  
669 *Acad Sci U S A* **113**, E3792-3800, doi:10.1073/pnas.1603562113 (2016).
- 670 39 Lee, D. W. *et al.* Molecular Mechanism of the Specificity of Protein Import  
671 into Chloroplasts and Mitochondria in Plant Cells. *Molecular plant* **12**,  
672 951-966, doi:10.1016/j.molp.2019.03.003 (2019).
- 673 40 Emanuelsson, O., Nielsen, H. & von Heijne, G. ChloroP, a neural network-  
674 based method for predicting chloroplast transit peptides and their  
675 cleavage sites. *Protein Sci* **8**, 978-984 (1999).
- 676 41 Schmitz, A. J., Glynn, J. M., Olson, B. J., Stokes, K. D. & Osteryoung, K. W.  
677 Arabidopsis FtsZ2-1 and FtsZ2-2 are functionally redundant, but FtsZ-  
678 based plastid division is not essential for chloroplast partitioning or plant  
679 growth and development. *Mol Plant* **2**, 1211-1222,  
680 doi:10.1093/mp/ssp077 (2009).

- 681 42 Chu, C. C. & Li, H. m. Determining the location of an Arabidopsis  
682 chloroplast protein using in vitro import followed by fractionation and  
683 alkaline extraction. *Methods Mol Biol* **774**, 339-350, doi:10.1007/978-1-  
684 61779-234-2\_20 (2011).
- 685 43 Pyke, K. A. & Leech, R. M. Rapid Image Analysis Screening Procedure for  
686 Identifying Chloroplast Number Mutants in Mesophyll Cells of  
687 Arabidopsis thaliana (L.) Heynh. *Plant physiology* **96**, 1193-1195,  
688 doi:10.1104/pp.96.4.1193 (1991).
- 689 44 Dogra, V. *et al.* FtsH2-Dependent Proteolysis of EXECUTER1 Is Essential in  
690 Mediating Singlet Oxygen-Triggered Retrograde Signaling in Arabidopsis  
691 thaliana. *Front Plant Sci* **8**, 1145, doi:10.3389/fpls.2017.01145 (2017).
- 692 45 Trapnell, C., Pachter, L. & Salzberg, S. L. TopHat: discovering splice  
693 junctions with RNA-Seq. *Bioinformatics* **25**, 1105-1111,  
694 doi:10.1093/bioinformatics/btp120 (2009).
- 695 46 Robinson, M. D., McCarthy, D. J. & Smyth, G. K. edgeR: a Bioconductor  
696 package for differential expression analysis of digital gene expression  
697 data. *Bioinformatics* **26**, 139-140, doi:10.1093/bioinformatics/btp616  
698 (2010).
- 699 47 Livak, K. J. & Schmittgen, T. D. Analysis of relative gene expression data  
700 using real-time quantitative PCR and the 2(-Delta Delta C(T)) Method.  
701 *Methods* **25**, 402-408, doi:10.1006/meth.2001.1262 (2001).
- 702 48 Dogra, V., Duan, J., Lee, K. P. & Kim, C. Impaired PSII proteostasis triggers a  
703 UPR-like response in the var2 mutant of Arabidopsis. *J Exp Bot* **70**, 3075-  
704 3088, doi:10.1093/jxb/erz151 (2019).
- 705 49 Kauss, D., Bischof, S., Steiner, S., Apel, K. & Meskauskiene, R. FLU, a  
706 negative feedback regulator of tetrapyrrole biosynthesis, is physically  
707 linked to the final steps of the Mg(++)-branch of this pathway. *FEBS Lett*  
708 **586**, 211-216, doi:10.1016/j.febslet.2011.12.029 (2012).
- 709 50 Lubber, C. A. *et al.* Quantitative proteomics reveals subset-specific viral  
710 recognition in dendritic cells. *Immunity* **32**, 279-289,  
711 doi:10.1016/j.immuni.2010.01.013 (2010).
- 712 51 Schwanhauser, B. *et al.* Global quantification of mammalian gene  
713 expression control. *Nature* **473**, 337-342, doi:10.1038/nature10098  
714 (2011).

715

## 716

### 717 **Figure legends**

718

#### 719 **Fig. 1 | Identification of *TIC236* gain-of-function mutations in *spcrl* mutants.**

720 **a**, The micro and macroscopic phenotypes of the *crl* suppressors *spcrl1*, *spcrl2*, and  
721 *spcrl3*. Top: Representative images of 21-d-old plants grown on soil (scale bar, 1 cm).

722 Middle: Confocal images representing chlorophyll autofluorescence (magenta) of  
723 mesophyll cells. Bottom: Cell death in 10-d-old cotyledons, as visualized by trypan

724 blue (TB) staining (scale bar, 0.5 mm). **b**, Whole-genome sequencing reveals the

725 causative missense mutations in a single genetic locus encoding the TIC236 protein,  
726 as indicated by red asterisks. **c**, The TIC236-like protein sequences from 27 plant  
727 species reported in Phytozome v12.1 were aligned using ClustalW. The three mutated  
728 residues in *spcrl* mutants are indicated with blue arrowheads. Aligned regions were  
729 visualized using WEBLOGO. **d**, Plant phenotypes of genetically isolated single  
730 mutants are shown (scale bar, 1 cm). **e**, Different levels of dominance for the D1212N  
731 (TIC236-4GF), G1250E (TIC236-5GF), and G1489R (TIC236-6GF) mutations are  
732 shown in each *tic236-4gf*, *tic236-5gf*, and *tic236-6gf* heterozygote (-/+) in the *crl* null  
733 mutant background (scale bars, 1 cm, 10  $\mu$ m, and 0.5 mm, respectively). **f**, Sanger  
734 DNA sequencing result of *TIC236* mutations in the plants shown in (**e**). The  
735 heterozygous *TIC236* mutations are indicated with black boxes. **g**, Heatmap showing  
736 the differentially expressed genes in *crl* versus WT and *spcrl1* plants. The genes with  
737 at least a two-fold change in expression and a false discovery rate of less than 0.05  
738 were selected. The colors of the heatmap represent the z-scores ranging from -2.0  
739 (blue) to 2.0 (red).

740

741 **Fig. 2 | CRL is associated with TOC components.**

742 **a**, Co-IP/immunoblot results of CRL-TOC interactions. Arabidopsis stable *GFP* and  
743 *CRL-GFP crl* transgenic plants were used. Total proteins were extracted from 5-d-old  
744 seedlings and then free GFP and CRL-GFP were pulled down. Subsequent  
745 immunoblot analysis was conducted using the indicated TOC and TIC antibodies.  
746 Coomassie blue (CBB) staining of the SDS-PAGE gels is shown as a loading control  
747 (for input samples). **b**, BiFC analysis. N-terminal Venus (nV)-fused CRL and C-  
748 terminal Venus (cV)-fused TOC33 (or TOC34) were transiently coexpressed in *N.*  
749 *benthamiana* leaves. The empty nV vector was used as a negative control. The  
750 representative Venus signals, chlorophyll autofluorescence (Chl) signals, and their  
751 merged images are shown. Scale bar, 10  $\mu$ m. **c**, Co-IP/immunoblot analysis. Different  
752 construct combinations, such as CRL-Myc alone, CRL-Myc and TOC33-GFP, or  
753 CRL-Myc and TOC34-GFP, were transiently overexpressed in *N. benthamiana* leaves.  
754 After 2 days, GFP-Trap magnetic beads were used to enrich the target and its  
755 associated proteins. Subsequent immunoblot analyses were carried out by using anti-  
756 GFP and anti-Myc antibodies.

757

758 **Fig. 3 | Loss of either SP1 or FTSH11 significantly rescues the *crl* phenotypes.**

759 **a**, SP1- and FTSH11-mediated TOC and TIC turnover<sup>18,20,22</sup>. **b-c**, Images representing  
760 21-d-old plants (top), chloroplasts in mesophyll cells (middle), and cell death in  
761 cotyledons (bottom) are shown (Scale bars: top, 5 mm; middle, 10  $\mu$ m; bottom, 0.5  
762 mm). **d**, The chloroplast ultrastructure of 5-d-old seedlings was monitored by  
763 transmission electron microscopy (scale bar, 5  $\mu$ m). **e**, From the same plant materials  
764 as in **(b)** and **(c)**, equal amounts of total protein were separated on SDS-PAGE gels  
765 and immunoblotted with the antibodies as indicated to detect the relative abundance  
766 of TIC and TOC proteins. The quantified protein abundance is shown as mean  $\pm$  SD  
767 of three independent biological repeats after normalization to *crl* or WT of the same  
768 experiments. All *P*-values are from Student's *t*-tests (two-tailed). \**P* < 0.05, \*\**P* <  
769 0.01, \*\*\**P* < 0.001. CBB staining of the SDS-PAGE gels is shown as a loading  
770 control.

771

772 **Fig. 4 | *TIC236GF* mutations rescue the *crl* mutant by stabilizing TIC236**  
773 **proteins.**

774 **a**, [<sup>35</sup>S]Met-labeled preproteins (Tr) were imported into chloroplasts isolated from 14-  
775 d-old plants of WT and the four *tic236* mutant alleles in 3 mM ATP at room  
776 temperature for 10 min. prFtsZ2-1 and prOE23 were co-imported, as was prHsp93  
777 and prFtsZ2-2. Re-isolated intact chloroplasts were analyzed by SDS-PAGE and the  
778 gels were stained with CBB and dried for fluorography. Equal amounts of proteins  
779 were loaded in each lane of the same gel, except for the Tr lane. The region around  
780 the chlorophyll *a/b* binding protein in the CBB-stained gels is shown below the  
781 fluorograph as a loading control. **b**, Imported mature proteins were quantified and  
782 normalized to that of the WT from the same gel and further corrected by the amount  
783 of the chlorophyll *a/b* binding protein in each lane. Data shown are mean  $\pm$  SD (n=3).  
784 *P*-values were obtained from two-tailed Student's *t*-tests. \**P* < 0.05, \*\**P* < 0.01, \*\*\**P*  
785 < 0.001. **c**, Chloroplasts isolated from the indicated genotypes were analysed by SDS-  
786 PAGE, followed by blotting onto nitrocellulose blotting membranes (Amersham  
787 Protran), and then hybridized with antibodies against proteins indicated at right. The  
788 dilutions used were: anti-Tic236 1:1000; anti-Toc75 1:6000; and anti-IEP37 1:4000. **d**,  
789 Label-free protein quantitation. iBAQ intensities are shown as mean  $\pm$  SD (n=3).  
790 Ribulose-bisphosphate carboxylase large-chain (RBCL) was chosen as the control.  
791 All *P*-values are from two-tailed Student's *t*-tests. \**P* < 0.05, \*\**P* < 0.01. *P* < 0.05. **e**,  
792 In WT, prPDM are imported through the CRL-TIC236-translocon module, enabling

793 plastid division. Either CRL loss or TIC236 knockdown compromises plastid division  
794 and induces cell death despite the core translocon complex remaining intact. Similar  
795 phenotypes were observed in the canonical plastid division mutants *arc6*, *pdv2*, and  
796 *ftsZ1*<sup>10,13</sup>. The TIC236GF mutations overcome CRL deficiency by reinforcing prPDM  
797 import. Reduced SP1-driven CHLORAD activity or loss of FTSH11 protease also  
798 rescues the *crl* phenotypes.

799

800 **Extended Data Fig. 1 | The *TIC236-6GF* mutation cannot fully rescue the *crl***  
801 **mutant phenotypes.** Confocal images at the same scale representing chlorophyll  
802 autofluorescence of each suppressor and WT plants (scale bar, 20  $\mu$ m). The enlarged  
803 chloroplast images are shown at right (scale bar, 10  $\mu$ m). White arrowheads indicate  
804 abnormally enlarged chloroplasts.

805

806 **Extended Data Fig. 2 | Alignment of protein sequences of Arabidopsis TIC236**  
807 **and *E. coli* TamB.** The amino acid sequences of TIC236 (protein accession number:  
808 NP\_180137) and TamB (protein accession number: NP\_418642) were obtained from  
809 NCBI (<https://www.ncbi.nlm.nih.gov/protein/>) and used for alignment using the Basic  
810 Local Alignment Search Tool (BLAST, <https://blast.ncbi.nlm.nih.gov>). Asterisks refer  
811 to conserved amino acid residues between proteins, and the mutated residues are  
812 highlighted in red. The identity of the two sequences is ~29%.

813

814 **Extended Data Fig. 3 | *crl*-induced stress-related nuclear genes are repressed in**  
815 ***spr11*.** The relative expression levels of selected *crl*-induced genes (versus WT) were  
816 analysed in *spr11* mutant seedlings using qRT-PCR. These genes include *AKR4C8*  
817 (*ALDO-KETO REDUCTASE FAMILY 4 MEMBER C8*), *ADH1* (*ALCOHOL*  
818 *DEHYDROGENASE 1*), *SMR7* (*SIAMESE-RELATED 7*), and *SRO3* (*SIMILAR TO*  
819 *RCD ONE 3*). *ACTIN2* (*ACT2*) was used as an internal control. Results represent the  
820 means of three independent biological replicates and error bars indicate SD. Lower  
821 case letters indicate statistically significant differences between mean values for each  
822 genotype ( $P < 0.05$ , ANOVA with post-hoc Tukey's Honest Significant Difference  
823 test).

824

825 **Extended Data Fig. 4 | The biologically active CRL-GFP fusion protein unveils**  
826 **CRL-associated proteins. a,** Top: images represent 21-d-old WT, *crl*, and *35S:CRL-*

827 *GFP crl* (*CRL-GFP crl*) plants. Scale bar, 5 mm. Middle: confocal images of  
828 chlorophyll autofluorescence of 5-d-old cotyledons (scale bar, 10  $\mu$ m). Bottom:  
829 localized cell death in 10-d-old cotyledons, as visualized by TB staining (scale bar,  
830 0.5 mm). **b**, Western blot of Co-IP using 14-d-old WT, *35S:GFP (GFP)*, and *CRL-*  
831 *GFP crl* plants. GFP-conjugated Dynabeads were used to pull down CRL-GFP and its  
832 associated proteins. The proteins were subjected to MS analysis after digestion. In  
833 parallel, equal amounts of proteins were used for Western blot analysis. Heavy and  
834 light chains of the GFP antibody are indicated. Equal protein loading is shown by  
835 CBB staining. **c**, List of proteins showing TOC and TIC components, together with  
836 CRL, which were detected at least twice in the eluates from *CRL-GFP crl* but not in  
837 *GFP* samples.

838

839 **Extended Data Fig. 5 | *sp1-3* significantly restores plastid division in *crl*.** Same-  
840 scale confocal images representing the chlorophyll autofluorescence in mesophyll  
841 cells of 5-d-old seedlings (scale bar, 50  $\mu$ m).

842

843 **Extended Data Fig. 6 | *ftsh11-2* significantly restores plastid division in *crl*.** **a**,  
844 Schematic representation of the FTSH11 gene (accession number: AT5G53170).  
845 Exons and introns are shown as black boxes and black lines between exons,  
846 respectively. The inverted triangles indicate the T-DNA insertion sites of the *ftsh11-1*  
847 (*SALK\_033047*) and *ftsh11-2* (*SALK\_012285*) mutants. **b**, Top: representative plant  
848 images of 21-d-old WT, *crl*, *ftsh11-2*, and *crl ftsh11-2* are shown (top panel). Middle:  
849 confocal images of chlorophyll signals from mesophyll cells (scale bar, 10  $\mu$ m).  
850 Bottom: cell death in cotyledons, as visualized via TB staining (scale bar, 0.5 mm).

851

852 **Extended Data Fig. 7 | The *tic236-2* mutant, like the *crl* mutant, exhibits cell**  
853 **lesion and defective plastid division phenotypes .** **a**, Top: representative images of  
854 the rosettes of 21-d-old plants (scale bars, 1 cm). Middle two panels: confocal images  
855 of chlorophyll autofluorescence and the cognate bright-field in 5-d-old cotyledons for  
856 guard cells (gc) and mesophyll cells (mc) (scale bars, 5  $\mu$ m and 40  $\mu$ m for gc and mc,  
857 respectively). Bottom: cell death in 10-d-old cotyledons, as visualized by TB staining  
858 (scale bar, 0.5 mm). **b** and **c**, Mesophyll cells of mature *crl* (**b**) and *tic236-2* (**c**) plants  
859 were observed by differential interference contrast (DIC) optics (scale bar: 20  $\mu$ m).



860

861 **Extended Data Fig. 8 | CRL interacts with transit peptides of FTSZ proteins. a**  
862 **and b**, Split-Venus constructs of CRL and the transit peptide (tp) lacking mature  
863 protein region (**a**) or tp-deleted mature protein (m) (**b**) of either RBCS, FTSZ1,  
864 FTSZ1, FTSZ2-1, or FTSZ2-2 were transiently coexpressed in *N. benthamiana* leaves.  
865 Fluorescence signal of the integrated Venus protein was monitored by confocal  
866 microscopy. Scale bar, 10  $\mu$ m.

867

868

### 869 **Acknowledgements**

870 We thank the Core Facility of Genomics and Bioinformatics in Shanghai Center for  
871 Plant Stress Biology (PSC) for carrying out whole-genome sequencing analysis and  
872 RNA-seq. We thank the Core Facility of Cell Biology in PSC for training students in  
873 the use of various microscopes. We also thank the Core Facility of Proteomics in PSC  
874 for conducting MS analysis. We thank Masato Nakai (Osaka University) for  
875 providing the anti-TOC75 antibody. This research was supported by the Strategic  
876 Priority Research Program from the Chinese Academy of Sciences (Grant No.  
877 XDB27040102), the 100-Talent Program of the Chinese Academy of Sciences and  
878 the National Natural Science Foundation of China (NSFC) (Grant No. 31871397) to  
879 C.K., and by grants to H.-m.L. from the Ministry of Science and Technology (grant  
880 number MOST 109-2326-B-001-009) and Academia Sinica of Taiwan.

881

### 882 **Author contributions**

883 C.K. conceived the project and designed the research; J.F., B.L., L.J.C., V.D., and S.L.  
884 conducted the experiments; J.F., B.L., V.D., P.W., H.M. L., and C.K. analysed the  
885 data; C.K. wrote the manuscript with input from all authors. All authors reviewed the  
886 manuscript.

887

### 888 **Competing interests**

889 The authors declare no competing interests.

890

891

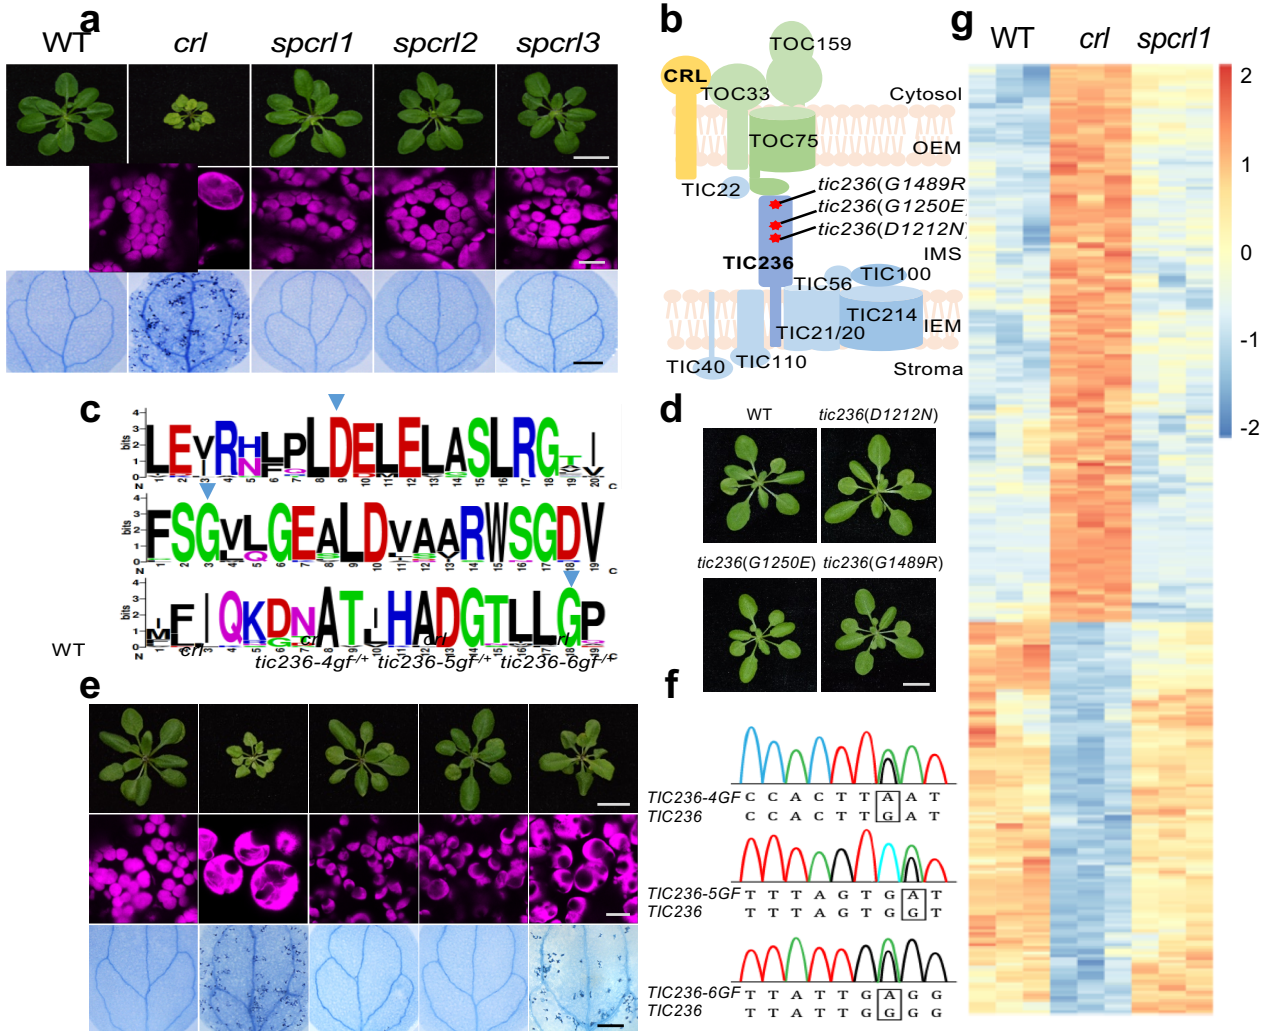

**Fig. 1 | Identification of *TIC236* gain-of-function mutations in *spcr1* mutants.**

**a**, The micro and macroscopic phenotypes of the *crl* suppressors *spcr11*, *spcr12*, and *spcr13*. Top: Representative images of 21-d-old plants grown on soil (scale bar, 1 cm). Middle: Confocal images representing chlorophyll autofluorescence (magenta) of mesophyll cells. Bottom: Cell death in 10-d-old cotyledons, as visualized by trypan blue (TB) staining (scale bar, 0.5 mm). **b**, Whole-genome sequencing reveals the causative missense mutations in a single genetic locus encoding the TIC236 protein, as indicated by red asterisks. **c**, The TIC236-like protein sequences from 27 plant species reported in Phytozome v12.1 were aligned using ClustalW. The three mutated residues in *spcr1* mutants are indicated with blue arrowheads. Aligned regions were visualized using WEBLOGO. **d**, Plant phenotypes of genetically isolated single mutants are shown (scale bar, 1 cm). **e**, Different levels of dominance for the D1212N (TIC236-4GF), G1250E (TIC236-5GF), and G1489R (TIC236-6GF) mutations are shown in each *tic236-4gf*, *tic236-5gf*, and *tic236-6gf* heterozygote (-/+ ) in the *crl* null mutant background (scale bars, 1 cm, 10  $\mu$ m, and 0.5 mm, respectively). **f**, Sanger DNA sequencing result of *TIC236* mutations in the plants shown in (**e**). The heterozygous *TIC236* mutations are indicated with black boxes. **g**, Heatmap showing the differentially expressed genes in *crl* versus WT and *spcr11* plants. The genes with at least a two-fold change in expression and a false discovery rate of less than 0.05 were selected. The colors of the heatmap represent the z-scores ranging from -2.0 (blue) to 2.0 (red).

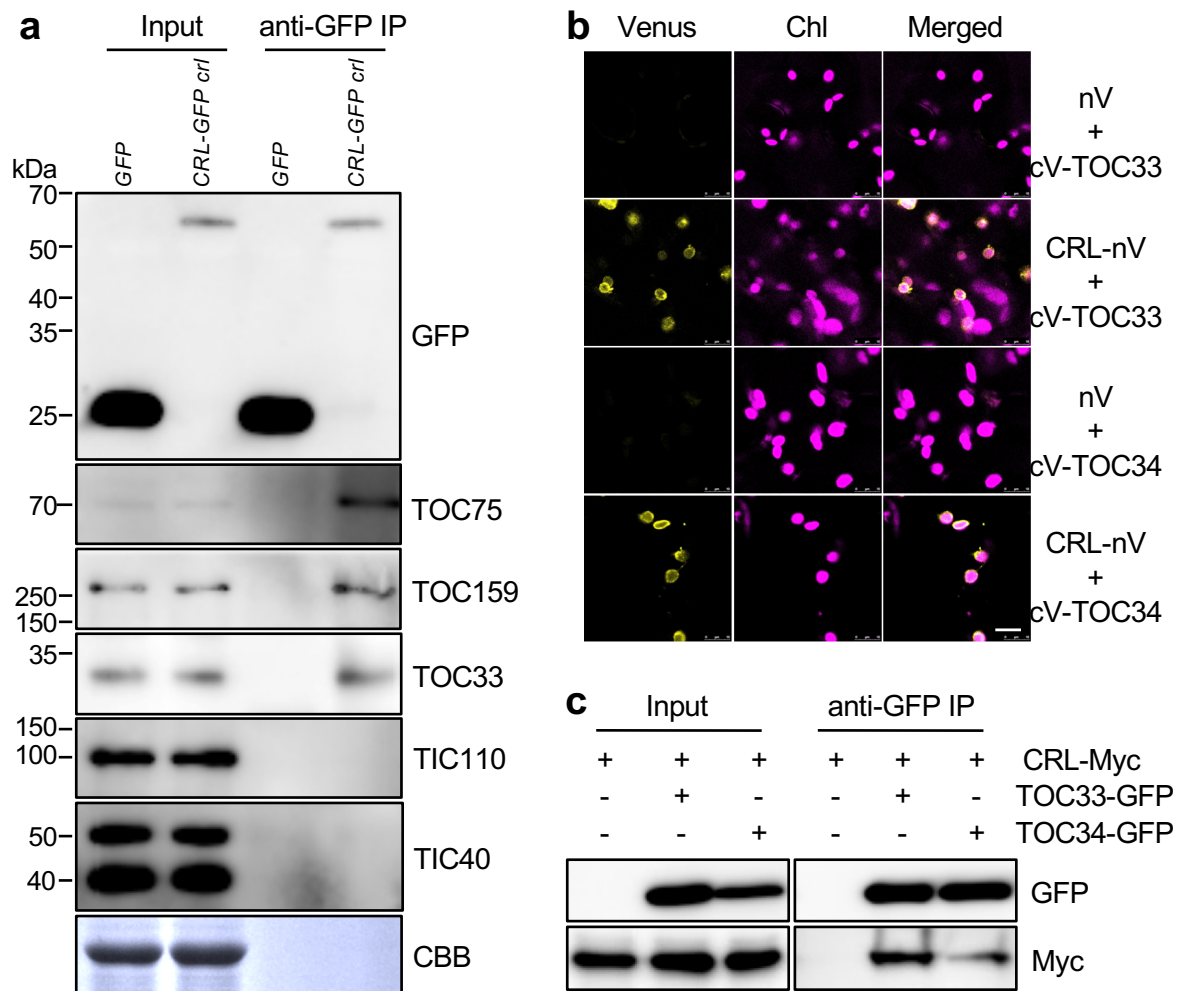

**Fig. 2 | CRL is associated with TOC components.**

**a**, Co-IP/immunoblot results of CRL-TOC interactions. Arabidopsis stable *GFP* and *CRL-GFP ctrl* transgenic plants were used. Total proteins were extracted from 5-d-old seedlings and then free *GFP* and *CRL-GFP* were pulled down. Subsequent immunoblot analysis was conducted using the indicated TOC and TIC antibodies. Coomassie blue (CBB) staining of the SDS-PAGE gels is shown as a loading control (for input samples). **b**, BiFC analysis. N-terminal Venus (nV)-fused CRL and C-terminal Venus (cV)-fused TOC33 (or TOC34) were transiently coexpressed in *N. benthamiana* leaves. The empty nV vector was used as a negative control. The representative Venus signals, chlorophyll autofluorescence (Chl) signals, and their merged images are shown. Scale bar, 10  $\mu$ m. **c**, Co-IP/immunoblot analysis. Different construct combinations, such as CRL-Myc alone, CRL-Myc and TOC33-GFP, or CRL-Myc and TOC34-GFP, were transiently overexpressed in *N. benthamiana* leaves. After 2 days, GFP-Trap magnetic beads were used to enrich the target and its associated proteins. Subsequent immunoblot analyses were carried out by using anti-GFP and anti-Myc antibodies.

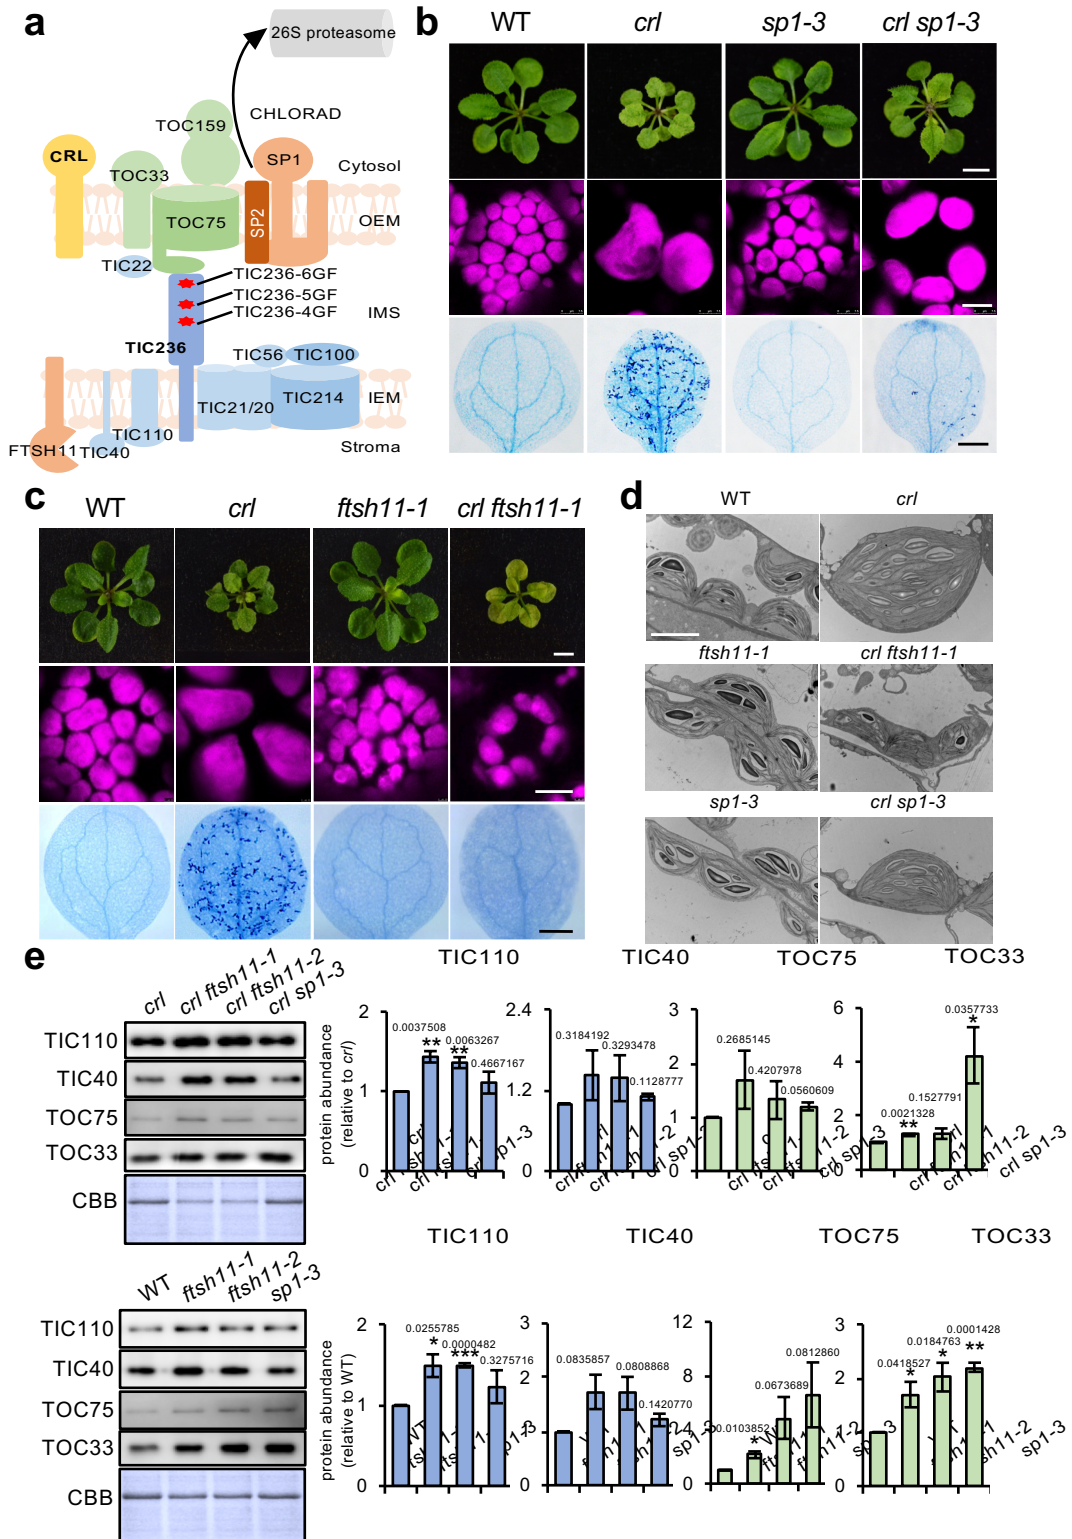

**Fig. 3 | Loss of either SP1 or FTSH11 significantly rescues the *crl* phenotypes.**

**a**, SP1- and FTSH11-mediated TOC and TIC turnover<sup>18,20,22</sup>. **b-c**, Images representing 21-d-old plants (top), chloroplasts in mesophyll cells (middle), and cell death in cotyledons (bottom) are shown (Scale bars: top, 5 mm; middle, 10  $\mu$ m; bottom, 0.5 mm). **d**, The chloroplast ultrastructure of 5-d-old seedlings was monitored by transmission electron microscopy (scale bar, 5  $\mu$ m). **e**, From the same plant materials as in **(b)** and **(c)**, equal amounts of total protein were separated on SDS-PAGE gels and immunoblotted with the antibodies as indicated to detect the relative abundance of TIC and TOC proteins. The quantified protein abundance is shown as mean  $\pm$  SD of three independent biological repeats after normalization to *crl* or WT of the same experiments. All *P*-values are from Student's *t*-tests (two-tailed). \**P* < 0.05, \*\**P* < 0.01, \*\*\**P* < 0.001. CBB staining of the SDS-PAGE gels is shown as a loading control.

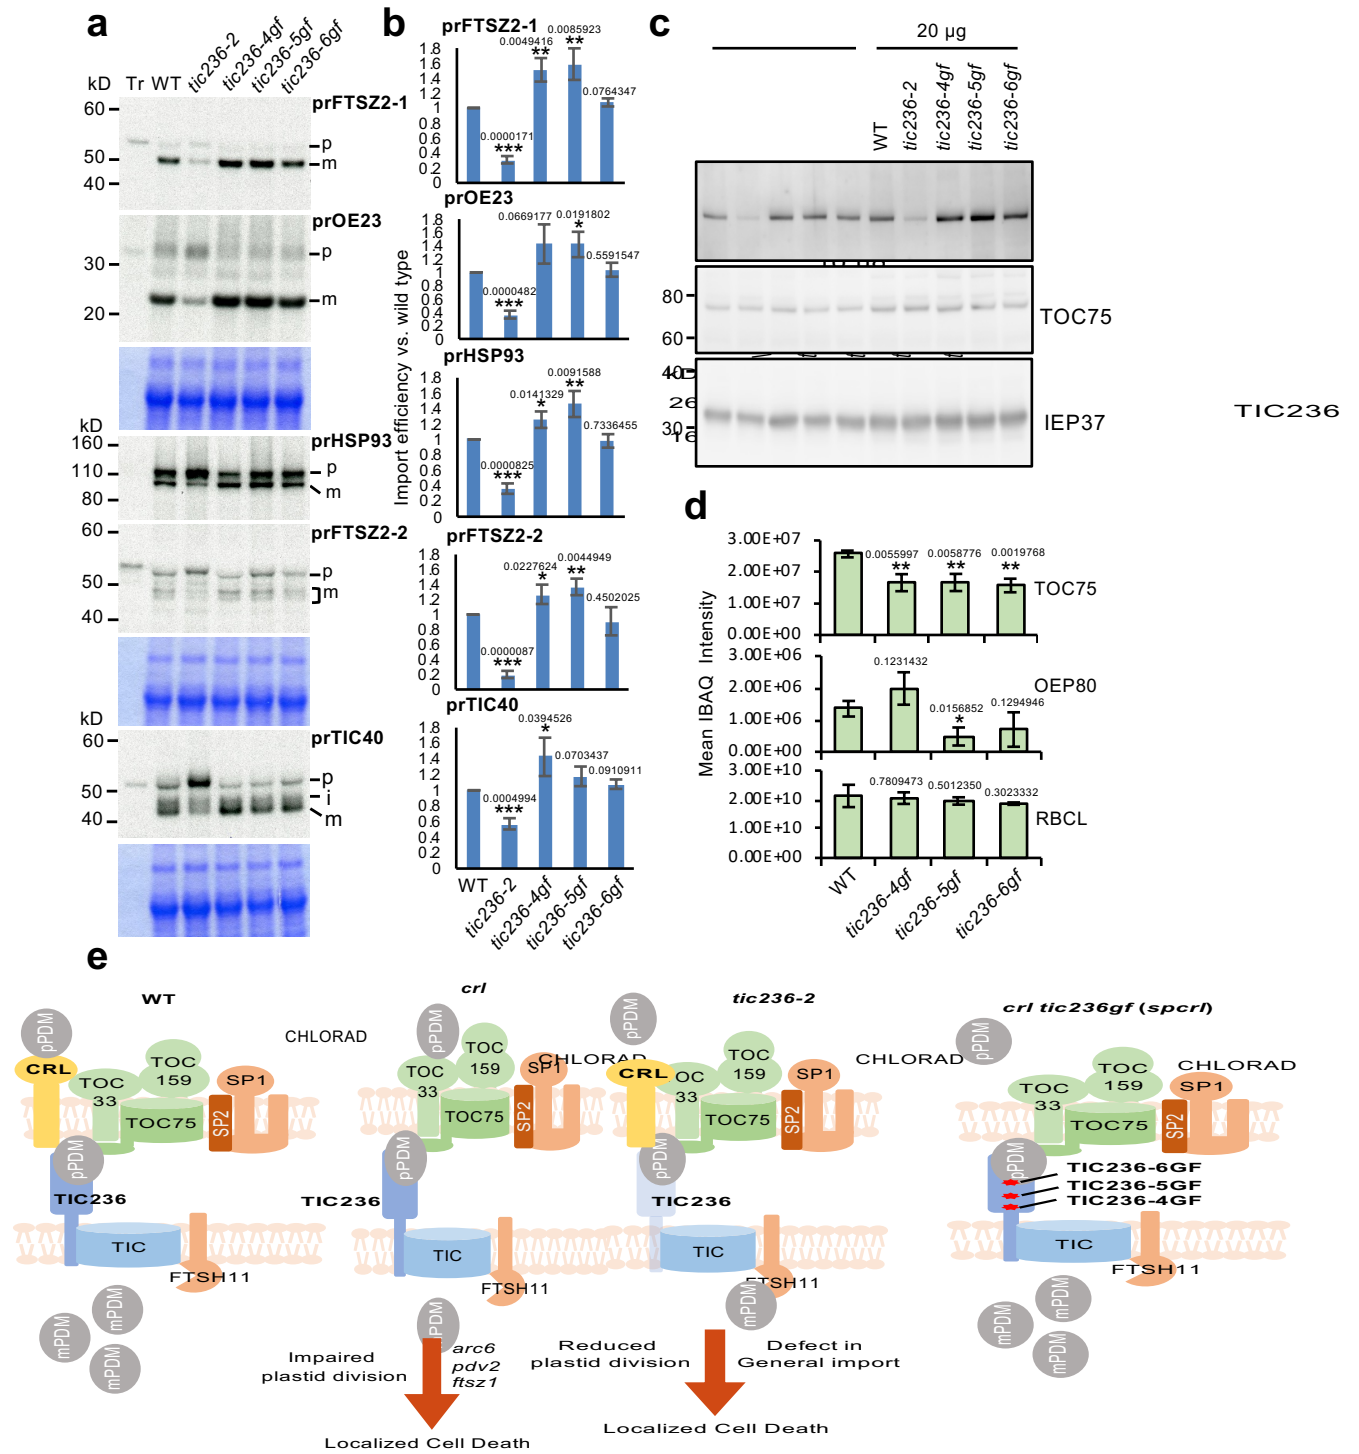

**Fig. 4 | TIC236GF mutations rescue the *crl* mutant by stabilizing TIC236 proteins.**

**a**, [<sup>35</sup>S]Met-labeled preproteins (Tr) were imported into chloroplasts isolated from 14-d-old plants of WT and the four *tic236* mutant alleles in 3 mM ATP at room temperature for 10 min. prFtsZ2-1 and prOE23 were co-imported, as was prHsp93 and prFtsZ2-2. Re-isolated intact chloroplasts were analyzed by SDS-PAGE and the gels were stained with CBB and dried for fluorography. Equal amounts of proteins were loaded in each lane of the same gel, except for the Tr lane. The region around the chlorophyll *a/b* binding protein in the CBB-stained gels is shown below the fluorograph as a loading control. **b**, Imported mature proteins were quantified and normalized to that of the WT from the same gel and further corrected by the amount of the chlorophyll *a/b* binding protein in each lane. Data shown are mean ± SD (n=3). *P*-values were obtained from two-tailed Student's *t*-tests. \**P* < 0.05, \*\**P* < 0.01, \*\*\**P* < 0.001. **c**, Chloroplasts isolated from the indicated genotypes were analysed by SDS-PAGE, followed by blotting onto nitrocellulose blotting membranes (Amersham Protran), and then hybridized with antibodies against proteins indicated at right. The dilutions used were: anti-Tic236 1:1000; anti-Toc75 1:6000; and anti-IEP37 1:4000. **d**, Label-free protein quantitation. iBAQ intensities are shown as mean ± SD (n=3). Ribulose-bisphosphate carboxylase large-chain (RBCL) was chosen as the control. All *P*-values are from two-tailed Student's *t*-tests. \**P* < 0.05, \*\**P* < 0.01. *P* < 0.05. **e**, In WT, prPDM are imported through the CRL-TIC236-translocon module, enabling plastid division. Either CRL loss or TIC236 knockdown compromises plastid division and induces cell death despite the core translocon complex remaining intact. Similar phenotypes were observed in the canonical plastid division mutants *arc6*, *pdv2*, and *ftsZ1*<sup>10, 13</sup>. The TIC236GF mutations overcome CRL deficiency by reinforcing prPDM import. Reduced SP1-driven CHLORAD activity or loss of FTSH11 protease also rescues the *crl* phenotypes.



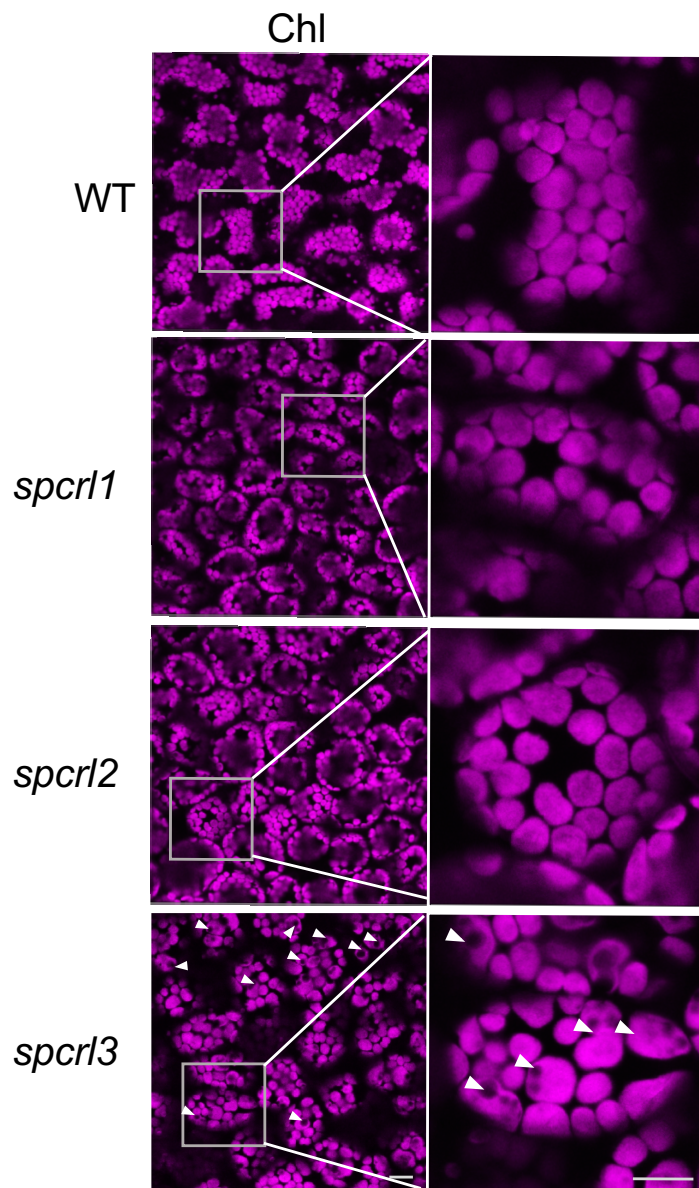

**Extended Data Fig. 1 | The *TIC236-6GF* mutation cannot fully rescue the *cr1* mutant phenotypes.** Confocal images at the same scale representing chlorophyll autofluorescence of each suppressor and WT plants (scale bar, 20  $\mu\text{m}$ ). The enlarged chloroplast images are shown at right (scale bar, 10  $\mu\text{m}$ ). White arrowheads indicate abnormally enlarged chloroplasts.

|             |                                                                                                                               |      |
|-------------|-------------------------------------------------------------------------------------------------------------------------------|------|
| Arabidopsis | MSLRQLQNFPLSTPLLHGSFNREKRINVARAFRSKRHYSEKKQNDWLAKVAFSQFCGKQVQLLRKSLDSRSMVEVKLKEPFRVRSKDLVRS LAPWEEGLFFLRCSVFFFAVISGVCLL       | 120  |
| Escherichia | -----MSLWKKI-----                                                                                                             | 7    |
| Arabidopsis | VWYGQNKARFVETKLLPSVCSVLSETIQREVDVFGKVRVSLPCLITLEASSIGPHGEEFSCGCVPTMKVCVRFASLRRGKIVVDAILSNPTVLAQKDFTWLGIPLSDTTLPShLSSE         | 240  |
| Escherichia | -----SLGVVI-----                                                                                                              | 13   |
| Arabidopsis | EGIDFRTKTRRVSRREEAGIRWDEERDNDARKAAEIGYIVPCKNYSQAKDNVAKHRRRFTIEANPNSFICMDEKMHSAEQHCHMDPGVEYDVKHAELEKSFSGIKIPGLSKFLSKMLKVP      | 360  |
| Escherichia | -----                                                                                                                         | 13   |
| Arabidopsis | YKFKNWSKSHKNSMNSISAKKRILERSASAALSYPHSLSQKLDPEPSVLSTNYDGLSLDMLLVKGDREISNQYDRHVPYGEQSLANDLDGKGYRVGRKRLLVGKKASTLTKFTVSCDPFL      | 480  |
| Escherichia | -----                                                                                                                         | 13   |
| Arabidopsis | MTVDRLCALLQTKRSPVEDIVNSSESETLSSQRGDISMNVNNTDDVPHGNRSNGNQPRDFTFKKHEHQVPVANHWPSPWRNKLEAVFNILTGSKKLTGRADPNAPHLSDELEKLP           | 600  |
| Escherichia | -----                                                                                                                         | 13   |
| Arabidopsis | AVYVEKTLPMVLDVQFGKGTLL--LAYGDE--P-REMRNVHGH-----VKF-----QNHYGRVYVQLGGNCNMWRSDVTSDEGGLLVSDVFDVTVEQNHANLNVANFFVPIF              | 701  |
| Escherichia | -----VILLLLGSVAFLVGTSSGLHLVFKAADRWVPLDVGKVTGGWRDLTSLDVRVEQPGVAVKAGNHLAVGLEC-LWNSSVCINDLAKDIOVNI DSKK-----MPPS                 | 113  |
| Arabidopsis | ERILEPIEWSKGRATGEVHLCMSRGESFPNLHGQLDVTGLGFHINDAPSSFDVSASLSFRGQRIFLHNANGWFQVPLEASGDFGIHPDEGEFHLMCQVVPYVEINALMKTFKMKPLFF        | 821  |
| Escherichia | EQ-----VEEEDSGPLDL---STPYPITLTRVALDNDVNIKIDDTTVSVMDFTSGLNWQEKTLTK-----PTS LKGLLI                                              | 180  |
| Arabidopsis | PLAGSVTAVFNCQGPLDAPVFGVSCMVRKIAYLS PDLPTSLAYEAMLKNKEAGAVAAFDVVPFYSLSANFTFNTDNCVADLYGIRATLVDGGEIRGAGNAWICPEGEVDDTALDVFSG       | 941  |
| Escherichia | AL-----                                                                                                                       | 182  |
| Arabidopsis | NISFDKVLHRYMPEYFNI GMLKLGDLTGETKLSGALLKPRFDIKWAAPKADGSLTDARGDIVISHDNIIVNSSVAFDLFTKLDTSYHDPCLSHQDFTQGEAMPFVVEGLDLDLRMRGFE      | 1061 |
| Escherichia | -----PKVAEVAQEE---VVEPKIE---NPQE-----EKPLGETLKLDFSRPVLPEM-----TDVHLPLNLSNEEFK                                                 | 239  |
| Arabidopsis | FFSLVSSYPDPRPHLTKATGRIKFLGKIKRHSTTKDGVGSKCEDAAAIISSLDGDISISSLKL NQLILAPQLSGRLSVSRDHVKLDAAGRPEDESITLDFIGLPLQPNSENQVSGKLL       | 1181 |
| Escherichia | -----GEQLRVTDGDT-----DITVR TMLLKVSSIDGNTKLDALDIDSSQGI VNASGTAQ-----                                                           | 288  |
| Arabidopsis | SFSLQKGQLRANACFPQQSATLRLNFPLDELELASLRGLIQKAEIQLNLQKRGHGLLSVIRPFGVGLGEBALDVAVRVSGDVCFM LSGRLEVIMITVEKT--ILEQSNRYELQGEYV        | 1299 |
| Escherichia | -----LSDNWPVDITLN-----STLNVPELKG E---KVKLVGALREQLEIGVNLGSPVDMDLRAQTR LAEAGLPLNVVNSKQIYWPFTGEKQ                                | 370  |
| Arabidopsis | LPGSRDRDLGQKEAGSFLMRAMTGHG LSVISSMGRWRMRLEVPKAEVAEMPLARLLRSRSDPAVHRSRDKLFIQSVQNLCLQA-ENLRDLLEEIRGYTPPSEVVLEDSLPLGLAELKG       | 1418 |
| Escherichia | YQ---ADDLK-----LKLTGKMTD YTL SMRTAVKGL EIP PATITL-----DAKNGEQ-----QVNLDKLTVAALEGKTELKALLD-----WQQA I                          | 442  |
| Arabidopsis | HWHGSLDASGCGGNDT LAEF-----DFHGDW EWGTYKTQ RVLATGSYNNDDGRLRLEMIQKGNATLHADGTL LEPKTNLHFVNLNFPVSLIFTLVEVVES-----                 | 1515 |
| Escherichia | SWRGLTLNGINTAKEIPEWPSKLNGLIKTRGSLYGGTWQMEVPEL---KLTGNV-----KQNKVNV DGT LKGN S-YMQWMPGLHLELGPNSAEVKGELGVKDLNL DAT              | 543  |
| Arabidopsis | -SATDIVHSLRKLKLSPIKGILHMEGDLRGSLEKPECDVQVRLLDGAVGGIDLGRAEVFASLTSNSRFLFNSNFEPFVQNGHVHIQGSVPVVSQK---NMSEGEVSETDRGG-----AV       | 1625 |
| Escherichia | INAPGLDNLAPGLG GTAKGLV K---RGTVEAPQLLADITARGLRWQELSAVQVRVEGDIKST-----DQIAGKLDVRVEQISQPDVYNINLVT LNAKGEKQHELQL                 | 642  |
| Arabidopsis | KIPSWAKEKEDDEKRTSRDRSEERWDSQLAELSK-----                                                                                       | 1659 |
| Escherichia | RIQGE-PVSGQLNLGASFDRKEERWGTLSNTRFQTPVGPWSLTRDIALD YRNKEQKTSIGPHGWLNPN AEICVPTIDAGAEGRAVNLNRFDLAMLKPFMPETTQASGIFTGKADVAW       | 761  |
| Arabidopsis | -----GLYWNILDAGEVRLE-----ADIKDGGM TLLTAISPYANWLQGNADIRLQVGVTVDHPVL                                                            | 1714 |
| Escherichia | DTTKBGLPQGSITL SGRNVQTQTVNDAALPVAFQTLNLTABELRNRAELGWTIRLTNNGQFDGQVQVTD PQGRRLN LGGNVIRNFNLA M INPIFRGEEK AAGMVSANLRLGGDVQSPQL | 881  |
| Arabidopsis | DGSASFHRASISSPVLRKPLTFNGGTLHVKS NR LCITSELSRVSRKGLVVKGNLPLRSNEASAGDGI ELKCEVLEVRANFLS CQV-DTQ LQITGSM LQPTISGNIKLSQGEAYLP HDK | 1833 |
| Escherichia | FQQLQVTVGVIDG-----NFMPFDMQPSQLAVNFNGMRSTLAGTVR TQQGEIYLN GDA                                                                  | 934  |
| Arabidopsis | GGGAAPLNRLAANQYSIPGAAINQAVSSRYFARF FGTERRASSGMKFSQSTGKSNV EKEIEEV MRKPNMDIRLSDMKVLVGP ELRIMYPLILNFAVSGELE-----LDGMAHPK--      | 1942 |
| Escherichia | DWSQIENWRAR--V-----TTKGSKRITVPPMVRMDVSDVVF EATPNFLTLDGRVDVPWA                                                                 | 989  |
| Arabidopsis | -----FIKPKGVLTFENGDNVLVATQVRLKREHLNVAKFEPEHGLDPL-LDLDLAVGSEWQFRVQRASRNWQDKLVV                                                 | 2012 |
| Escherichia | RIVVHDLPEAVGVSDV VMLNDNLQPEEPKTASIPINSNLIVHVGNVRI DAFGLKARLTGDLNVVQDKQGLGL--NQQINIPEGRFHYAGQDLIVRKGELLSFGPPD-QPYLNIEAI        | 1105 |
| Arabidopsis | TSTRSVEQD-----ALSPSEAAKVFESQ---L-AESILEGDQLAF-----KKLATATLGTIMPRIEGKGEFGQARWRLVYAPQIPSLLSVDPTVDPLKSLA-SNISFG                  | 2106 |
| Escherichia | RNPDATEDDVIAGVRVTGLAEPKAEI FSDPAM SQQAALSYLLRQGLESQSDSAAMTSM LIGLVQAQSQIGVKIGE--TFGVSNLALDTQ-----GVGDSSQVVVSGYVLP             | 1213 |
| Arabidopsis | TEVEVQLGKRLQASVVRQMKDSEMAMQWTLIYQLT SRLRVLLQS--APSKRLLFEYSATSQD                                                               | 2166 |
| Escherichia | L--QVKYGVGIFDS-----IATLTLRYRLMPKLYLEAVSGVDQALD LLYQFEF----                                                                    | 1259 |

**Extended Data Fig. 2 | Alignment of protein sequences of Arabidopsis TIC236 and *E. coli* TamB.** The amino acid sequences of TIC236 (protein accession number: NP\_180137) and TamB (protein accession number: NP\_418642) were obtained from NCBI (<https://www.ncbi.nlm.nih.gov/protein/>) and used for alignment using the Basic Local Alignment Search Tool (BLAST, <https://blast.ncbi.nlm.nih.gov>). Asterisks refer to conserved amino acid residues between proteins, and the mutated residues are highlighted in red. The identity of the two sequences is ~29%.

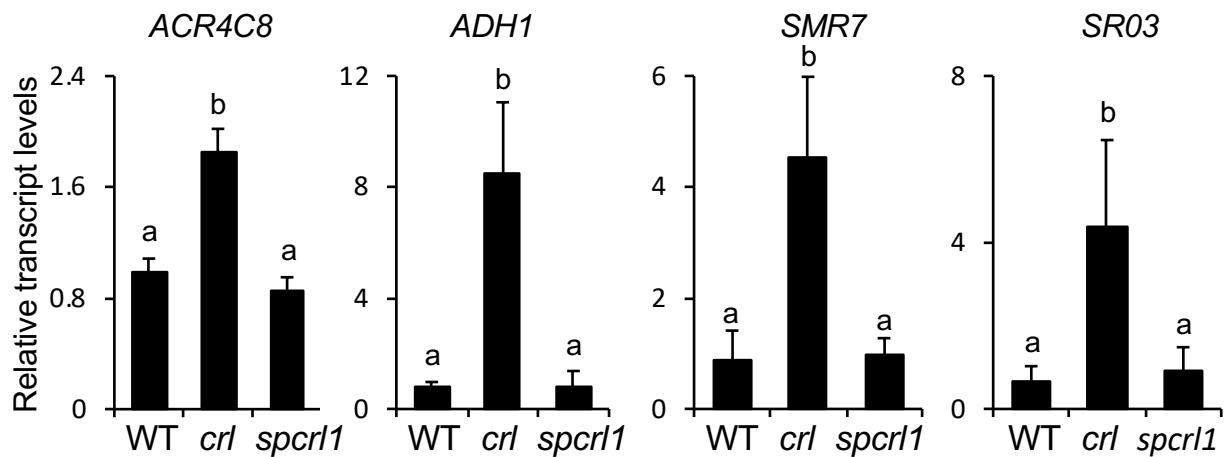

**Extended Data Fig. 3 | *crl*-induced stress-related nuclear genes are repressed in *spcr11*.** The relative expression levels of selected *crl*-induced genes (versus WT) were analysed in *spcr11* mutant seedlings using qRT-PCR. These genes include *AKR4C8* (*ALDO-KETO REDUCTASE FAMILY 4 MEMBER C8*), *ADH1* (*ALCOHOL DEHYDROGENASE 1*), *SMR7* (*SIAMESE-RELATED 7*), and *SRO3* (*SIMILAR TO RCD ONE 3*). *ACTIN2* (*ACT2*) was used as an internal control. Results represent the means of three independent biological replicates and error bars indicate SD. Lower case letters indicate statistically significant differences between mean values for each genotype ( $P < 0.05$ , ANOVA with post-hoc Tukey's Honest Significant Difference test).

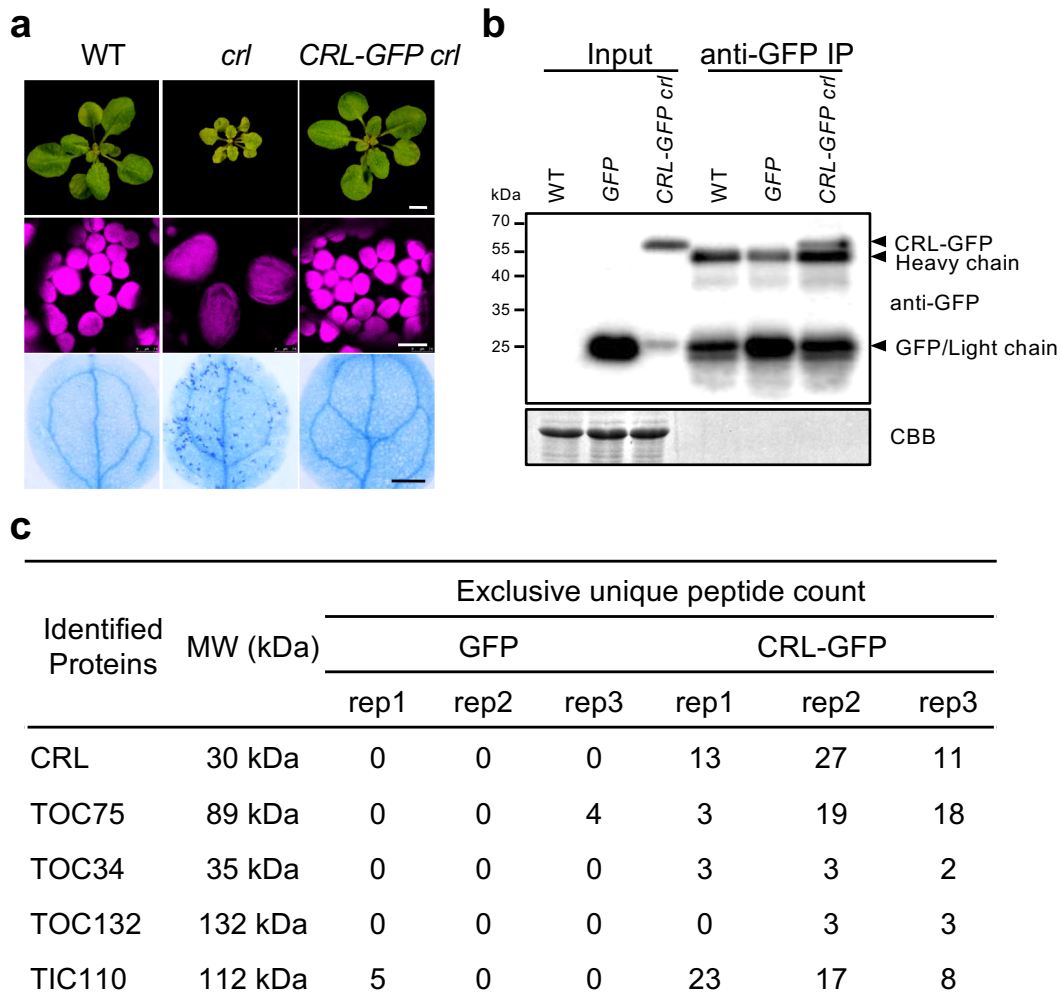

**Extended Data Fig. 4 | The biologically active CRL-GFP fusion protein unveils CRL-associated proteins.** **a**, Top: images represent 21-d-old WT, *cr1*, and *35S:CRL-GFP cr1* (*CRL-GFP cr1*) plants. Scale bar, 5 mm. Middle: confocal images of chlorophyll autofluorescence of 5-d-old cotyledons (scale bar, 10  $\mu$ m). Bottom: localized cell death in 10-d-old cotyledons, as visualized by TB staining (scale bar, 0.5 mm). **b**, Western blot of Co-IP using 14-d-old WT, *35S:GFP* (*GFP*), and *CRL-GFP cr1* plants. GFP-conjugated Dynabeads were used to pull down CRL-GFP and its associated proteins. The proteins were subjected to MS analysis after digestion. In parallel, equal amounts of proteins were used for Western blot analysis. Heavy and light chains of the GFP antibody are indicated. Equal protein loading is shown by CBB staining. **c**, List of proteins showing TOC and TIC components, together with CRL, which were detected at least twice in the eluates from *CRL-GFP cr1* but not in *GFP* samples.

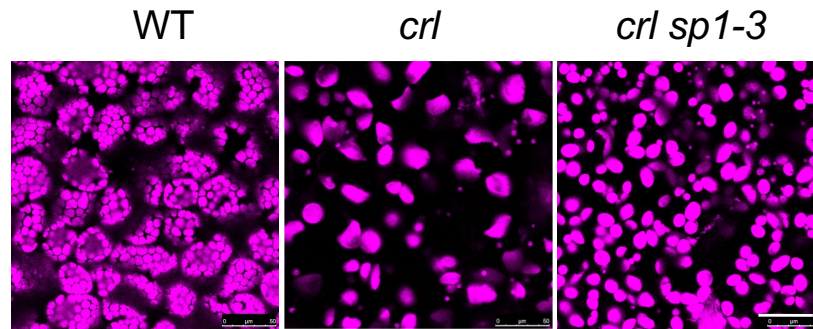

**Extended Data Fig. 5 | *sp1-3* significantly restores plastid division in *crl*.** Same-scale confocal images representing the chlorophyll autofluorescence in mesophyll cells of 5-d-old seedlings (scale bar, 50 µm).

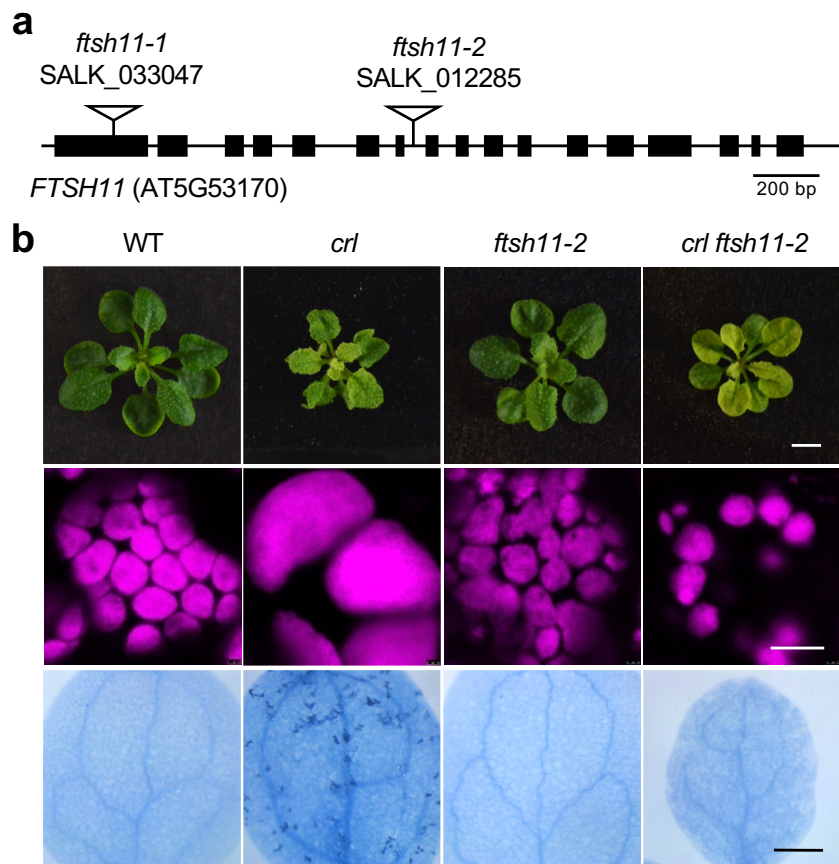

**Extended Data Fig. 6 | *ftsh11-2* significantly restores plastid division in *crl*.** **a**, Schematic representation of the FTSH11 gene (accession number: AT5G53170). Exons and introns are shown as black boxes and black lines between exons, respectively. The inverted triangles indicate the T-DNA insertion sites of the *ftsh11-1* (SALK\_033047) and *ftsh11-2* (SALK\_012285) mutants. **b**, Top: representative plant images of 21-d-old WT, *crl*, *ftsh11-2*, and *crl ftsh11-2* are shown (top panel). Middle: confocal images of chlorophyll signals from mesophyll cells (scale bar, 10  $\mu$ m). Bottom: cell death in cotyledons, as visualized via TB staining (scale bar, 0.5 mm).

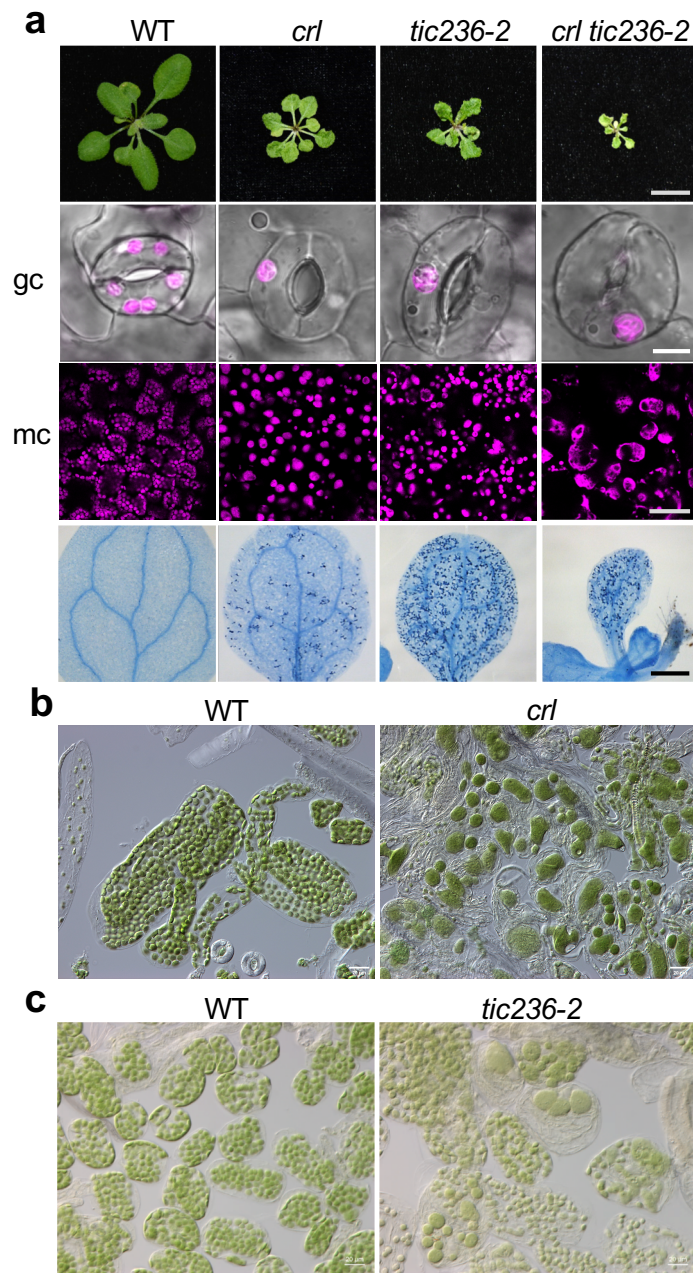

**Extended Data Fig. 7 | The *tic236-2* mutant, like the *crl* mutant, exhibits cell lesion and defective plastid division phenotypes . a**, Top: representative images of the rosettes of 21-d-old plants (scale bars, 1 cm). Middle two panels: confocal images of chlorophyll autofluorescence and the cognate bright-field in 5-d-old cotyledons for guard cells (gc) and mesophyll cells (mc) (scale bars, 5  $\mu$ m and 40  $\mu$ m for gc and mc, respectively). Bottom: cell death in 10-d-old cotyledons, as visualized by TB staining (scale bar, 0.5 mm). **b** and **c**, Mesophyll cells of mature *crl* (**b**) and *tic236-2* (**c**) plants were observed by differential interference contrast (DIC) optics (scale bar: 20  $\mu$ m).

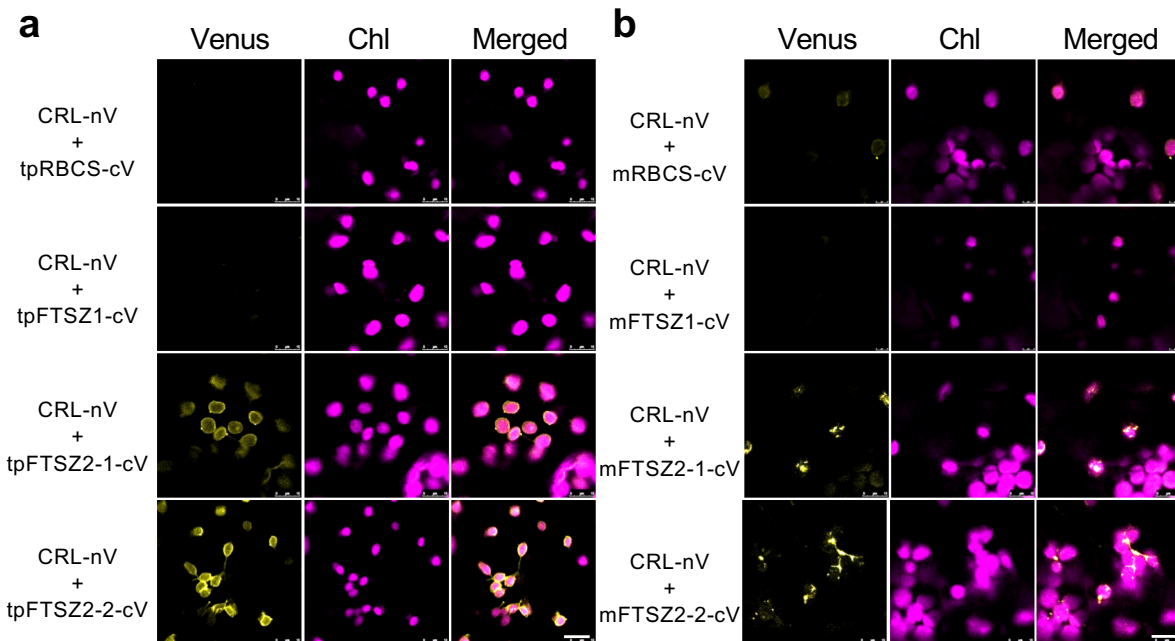

**Extended Data Fig. 8 | CRL interacts with transit peptides of FTSZ proteins. a and b,** Split-Venus constructs of CRL and the transit peptide (tp) lacking mature protein region (**a**) or tp-deleted mature protein (m) (**b**) of either RBCS, FTSZ1, FTSZ1, FTSZ2-1, or FTSZ2-2 were transiently coexpressed in *N. benthamiana* leaves. Fluorescence signal of the integrated Venus protein was monitored by confocal microscopy. Scale bar, 10  $\mu$ m.
